# Supplementary material for: Crystalline phosphino(silyl)carbenes that readily form transition metal complexes
Source: Royal Society of Chemistry journal article supplement (doi:10.1039/d2cc04321a), 2022-01-01
Supplement: d2cc04321a1.pdf [file d2cc04321a1.pdf]

## **Supplementary Material for**

### **Crystalline phosphino(silyl)carbenes that readily form transition metal complexes**

Pawel Löwe,<sup>a</sup> Fabian Dielmann<sup>\*b</sup>

<sup>a</sup> Institut für Anorganische und Analytische Chemie, Westfälische Wilhelms-Universität Münster, Corrensstraße 30, 48149 Münster, Germany.

<sup>b</sup> Institute of General, Inorganic and Theoretical Chemistry, Leopold-Franzens-Universität Innsbruck, Innrain 80-82, 6020 Innsbruck (Austria), E-mail: Fabian.Dielmann@uibk.ac.at.

# CONTENTS:

|          |                                                                   |           |
|----------|-------------------------------------------------------------------|-----------|
| <b>1</b> | <b>Experimental procedures</b>                                    | <b>3</b>  |
| 1.1      | Synthetic Details                                                 | 3         |
|          | Preparation of <b>1b</b>                                          | 4         |
| 1.2      | Preparation of <b>3a</b>                                          | 8         |
| 1.3      | Preparation of <b>3b</b>                                          | 13        |
| 1.4      | Preparation of <b>4</b>                                           | 17        |
| 1.5      | Preparation of <b>6</b>                                           | 23        |
| 1.6      | Crystallization of <b>7</b> and attempt of its targeted synthesis | 28        |
| <b>2</b> | <b>Determination of % <math>V_{bur}</math> and steric maps</b>    | <b>29</b> |
| 2.1      | Steric map of compound <b>4</b>                                   | 30        |
| 2.2      | Steric map of (ItBu)AuCl                                          | 31        |
| 2.3      | Steric map of (sIDipp)AuCl                                        | 31        |
| <b>3</b> | <b>X-ray Diffraction Studies</b>                                  | <b>32</b> |
| 3.1      | Crystal structure data of compound <b>1a</b>                      | 33        |
| 3.2      | Crystal structure data of compound <b>1b</b>                      | 34        |
| 3.3      | Crystal structure data of compound <b>3a</b>                      | 35        |
| 3.4      | Crystal structure data of compound <b>3b</b>                      | 36        |
| 3.5      | Crystal structure data of compound <b>4</b>                       | 37        |
| 3.6      | Crystal structure data of compound <b>6</b>                       | 38        |
| 3.7      | Crystal structure data of compound <b>7</b>                       | 39        |
| <b>4</b> | <b>Computational studies</b>                                      | <b>40</b> |
| 4.1      | General                                                           | 40        |
| 4.2      | Optimized structures                                              | 40        |
| 4.3      | Selected molecular orbitals                                       | 41        |
| 4.4      | XYZ data of the optimized structures                              | 42        |
| <b>5</b> | <b>References</b>                                                 | <b>45</b> |

# 1 Experimental procedures

## 1.1 Synthetic Details

**General remarks:** All manipulations, if not stated differently, were performed under an inert atmosphere of dry argon, using standard Schlenk and drybox techniques. Dry and oxygen-free solvents were employed. All glassware was oven-dried at 160 °C prior to use.  $^1\text{H}$ ,  $^{13}\text{C}$  and  $^{31}\text{P}$  NMR spectra were recorded at 300 K on Agilent DD2 600, Bruker AVANCE I 400, Bruker AVANCE III 400 or Bruker AVANCE II 200 spectrometers. Chemical shifts are given in parts per million (ppm) relative to  $\text{SiMe}_4$  ( $^1\text{H}$ ,  $^{13}\text{C}$ ), 85%  $\text{H}_3\text{PO}_4$  ( $^{31}\text{P}$ ) and they were referenced to the residual solvent signals ( $\text{CD}_3\text{CN}$ :  $^1\text{H}$   $\delta_{\text{H}} = 1.94$  ppm,  $^{13}\text{C}$   $\delta_{\text{C}} = 118.26$  ppm;  $\text{C}_6\text{D}_6$ :  $^1\text{H}$   $\delta_{\text{H}} = 7.16$  ppm,  $^{13}\text{C}$   $\delta_{\text{C}} = 128.0$  ppm;  $\text{THF-}d_8$ :  $^1\text{H}$   $\delta_{\text{H}} = 3.58$  ppm,  $^{13}\text{C}$   $\delta_{\text{C}} = 67.21$  ppm) or internally by the instrument after locking and shimming to the deuterated solvent ( $^{31}\text{P}$ ). Chemical shifts ( $\delta$ ) are reported in ppm. NMR multiplicities are abbreviated as follows: s = singlet, d = doublet, t = triplet, p = pentet, sept = septet, m = multiplet, br = broad signal. Mass spectrometry was recorded using an Orbitrap LTQ XL (Thermo Scientific) spectrometer. HepatoChem EvoluChem<sup>TM</sup> LED 365PF (365 nm) was used for the irradiation experiments. Melting points were measured in glass capillaries sealed under argon gas by using a Stuart Melting Point Apparatus SMP3.

**Reagents and Handling:** All compounds were purchased from commercial sources (Sigma Aldrich, Alfa Aesar, Tokyo Chemical Industry) and used as received, if not stated differently.  $\text{Au}(\text{tht})\text{Cl}^1$  (tht = tetrahydrothiophene),  $\text{CuOtBu}^2$ ,  $\text{Ni}t\text{Bu}(\text{SiMe}_3)$  (1,3-di-(*tert*-butyl)-N-(trimethylsilyl)-imidazol-2-imine)<sup>3</sup> and **1a**<sup>4</sup> were synthesized via literature procedures.

## Preparation of **1b**

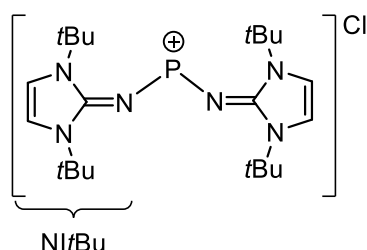

Ni*t*Bu(SiMe<sub>3</sub>) (1,3-di-(*tert*-butyl)-N-(trimethylsilyl)-imidazol-2-imine) (15.1 mmol, 4.04 g, 2.00 eq) was dissolved in tetrahydrofuran (50 mL). At 21 °C, PCl<sub>3</sub> (7.5 mmol, 0.66 mL, 1.00 eq) was added to the stirred mixture. Immediately upon addition, a yellow precipitate formed. The mixture was further stirred for 16 h at 21 °C. Afterwards, the precipitate was isolated by filtration of the mixture. The product is recrystallized out of hot acetonitrile. The crystals were isolated by pipetting off the mother liquor and dried *in vacuo* (1·10<sup>-3</sup> mbar) at 85 °C for 16 h. **1b** was obtained as a

yellow crystalline solid.

**Yield:** 3.43 g (6.25 mmol, 83%).

**<sup>1</sup>H NMR (400 MHz, CD<sub>3</sub>CN):** δ = 7.09 (s, 4H, N-CH=CH-N), 1.64 (s, 36H, *t*Bu).

**<sup>13</sup>C{<sup>1</sup>H} NMR (101 MHz, CD<sub>3</sub>CN):** δ = 146.1 (d, <sup>2</sup>J<sub>CP</sub> = 25 Hz, C=N-P), 114.3 (N-CH=CH-N), 59.5 (CMe<sub>3</sub>), 30.1 (C(CH<sub>3</sub>)<sub>3</sub>), 30.0 (C(CH<sub>3</sub>)<sub>3</sub>).

**<sup>31</sup>P NMR (162 MHz, CD<sub>3</sub>CN):** δ = 296.8.

**<sup>35</sup>Cl NMR (39 MHz, CD<sub>3</sub>CN):** δ = 44.4.

**HR-MS (ESI):** Calculated for [C<sub>22</sub>H<sub>42</sub>N<sub>6</sub>O<sub>2</sub>P]<sup>+</sup> (**1b**-Cl+H<sub>2</sub>O)<sup>+</sup>: m/z = 437.31522, found: m/z = 437.31534.

**Single crystal X-ray diffraction analysis:** Single crystals suitable for X-ray diffraction analysis were obtained (*vide supra*). The structure of **1b** was confirmed.

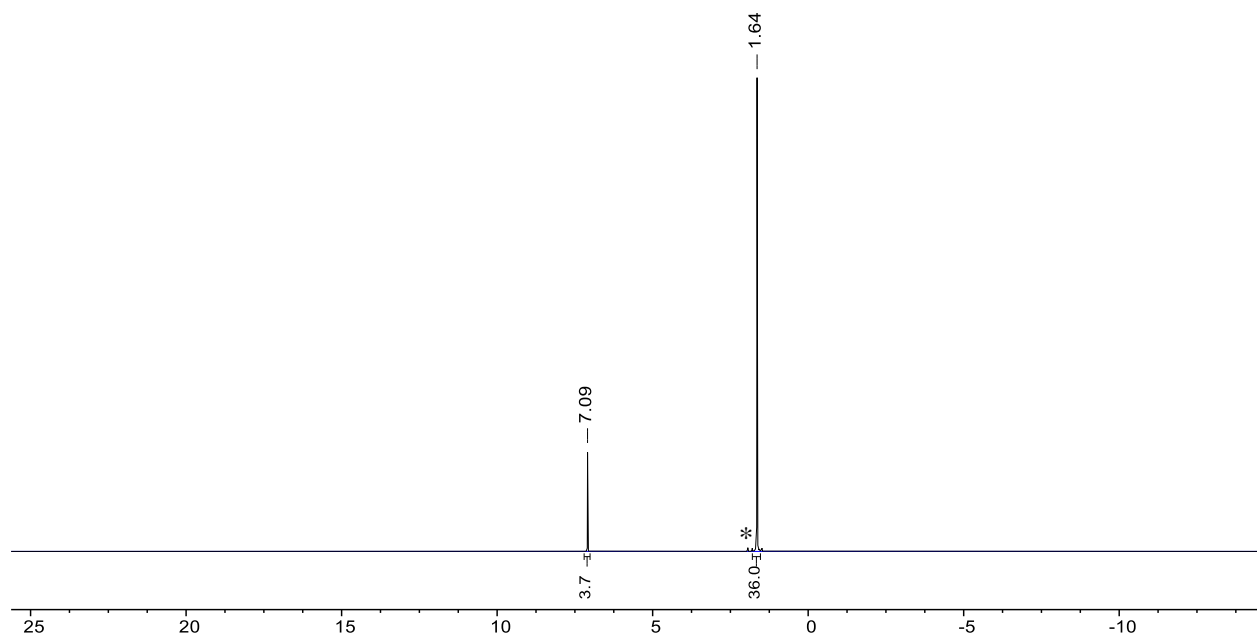

Figure S 1: <sup>1</sup>H NMR (400 MHz, 300K) spectrum of **1b** in CD<sub>3</sub>CN. The asterisk (\*) marks the solvent signal (too weak to be seen at the given amplification level).

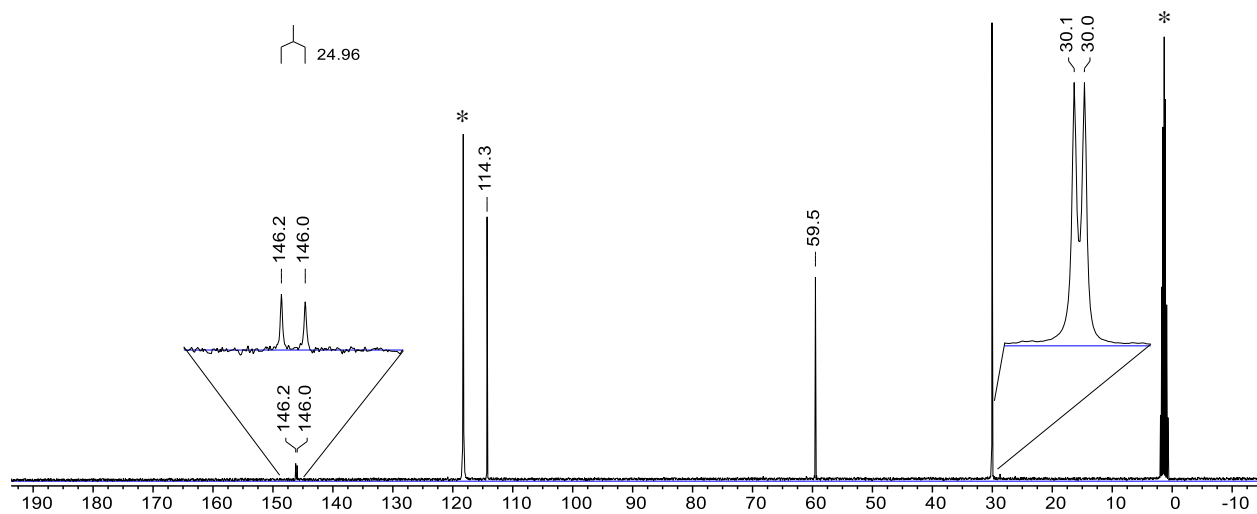

Figure S 2:  $^{13}\text{C}\{^1\text{H}\}$  NMR (101 MHz, 300K) spectrum of **1b** in  $\text{CD}_3\text{CN}$ . The asterisks (\*) mark the solvent signals.

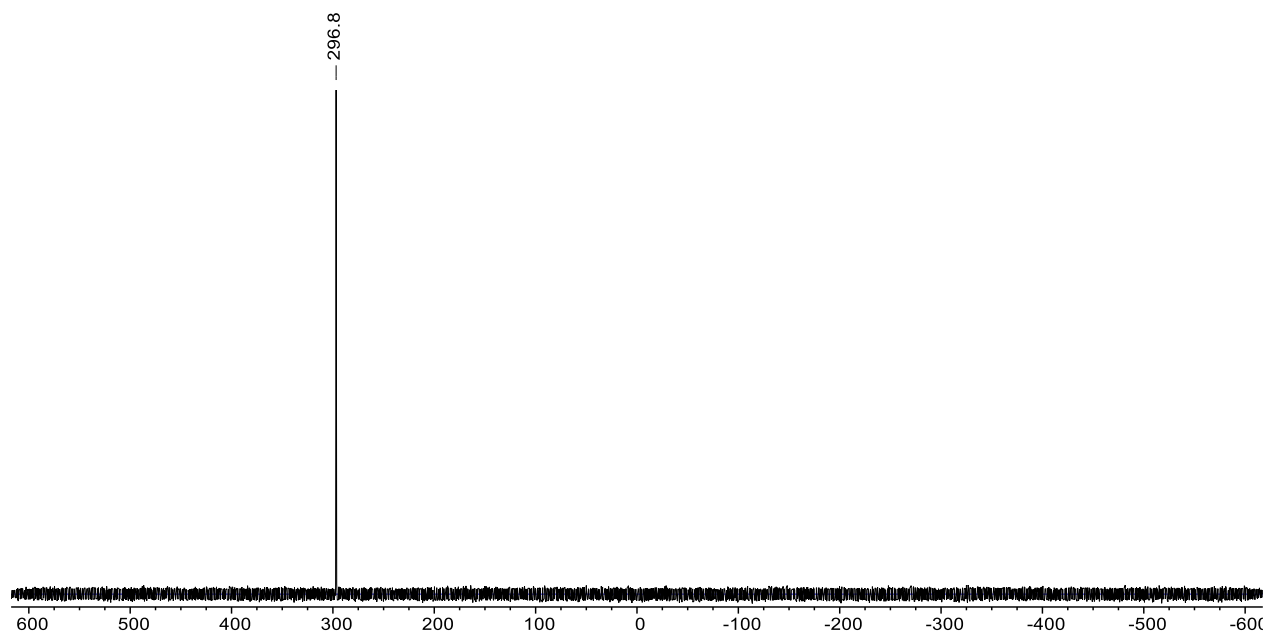

Figure S 3:  $^{31}\text{P}$  NMR (162 MHz, 300K) spectrum of **1b** in  $\text{CD}_3\text{CN}$ .

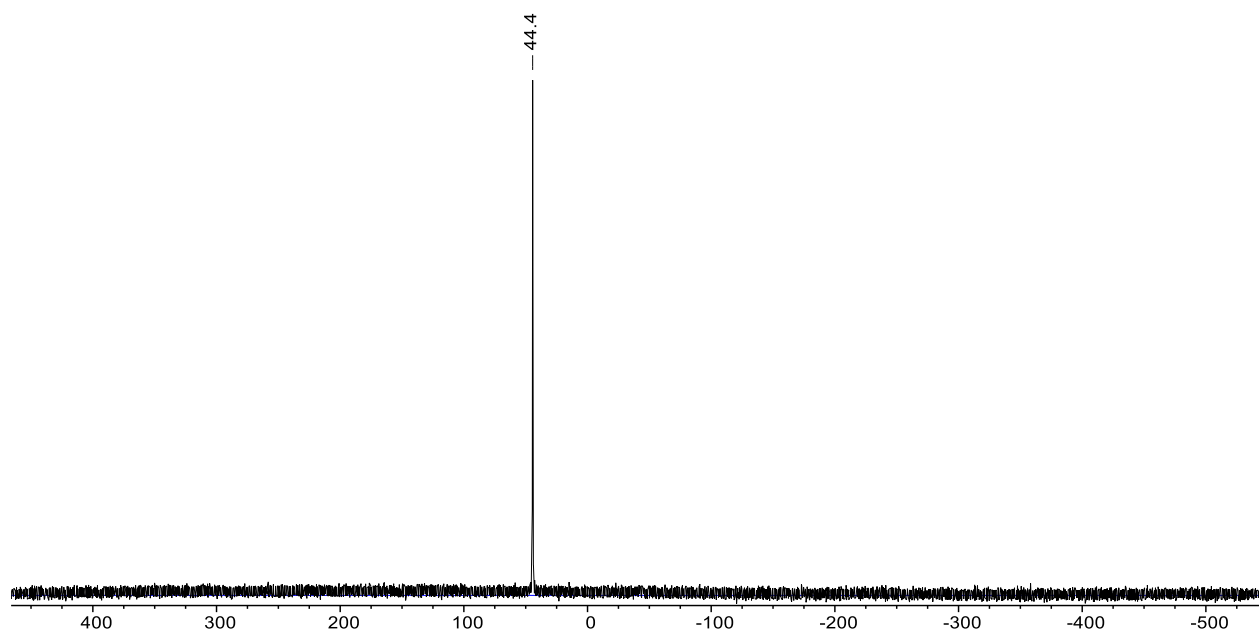

Figure S 4:  $^{35}\text{Cl}$  NMR (39 MHz, 300K) spectrum of **1b** in  $\text{CD}_3\text{CN}$ .

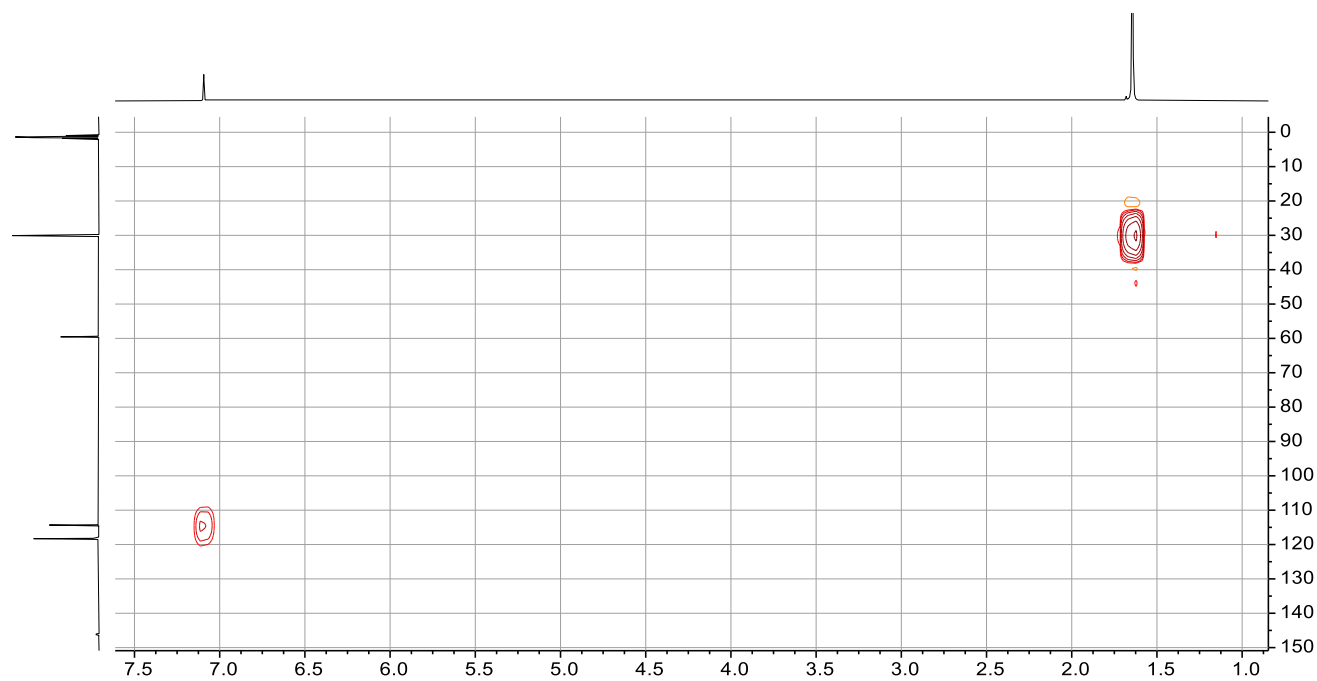

Figure S 5:  $^1\text{H}/^{13}\text{C}\{^1\text{H}\}$  HSQC NMR spectrum of **1b** in  $\text{CD}_3\text{CN}$ .

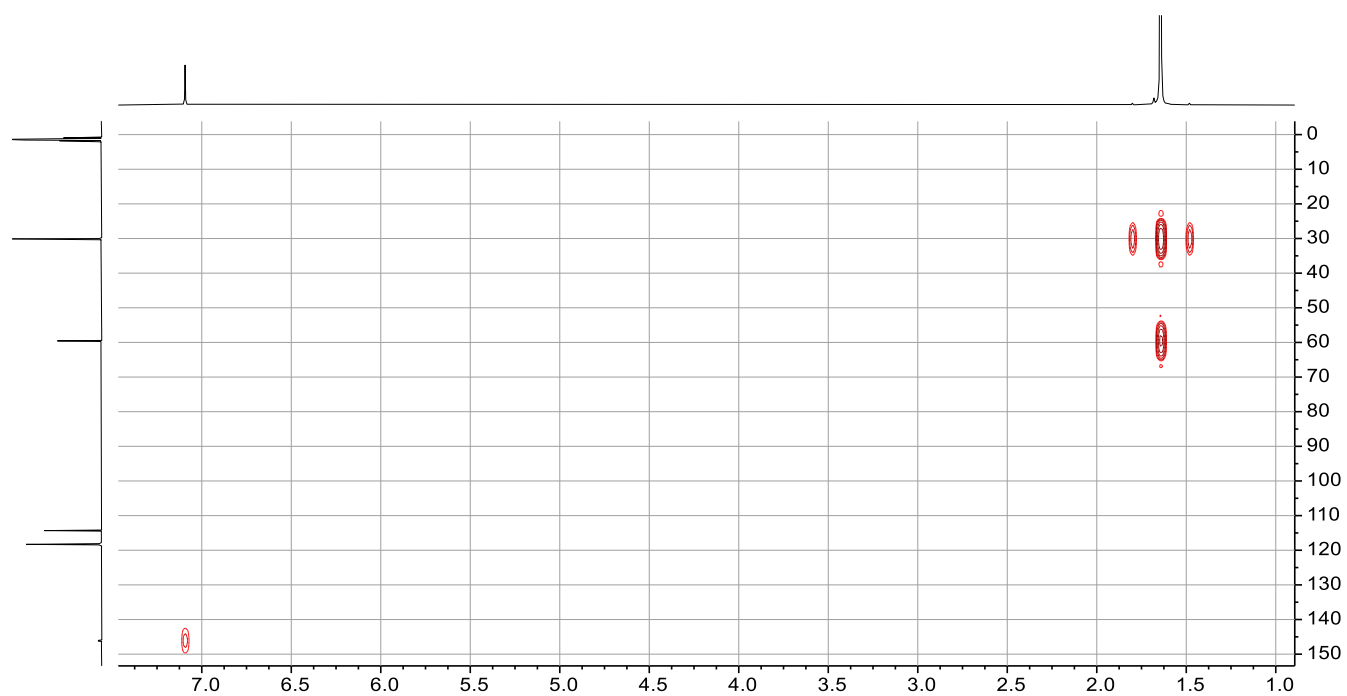

Figure S 6:  $^1\text{H}/^{13}\text{C}\{^1\text{H}\}$  HMBC NMR spectrum of **1b** in  $\text{CD}_3\text{CN}$ .

## 1.2 Preparation of **3a**

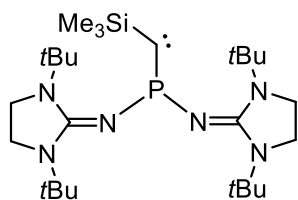

Note: Until the irradiation step, this reaction was performed in the dark.

Trimethylsilyldiazomethane (0.826 mL, 2.0 M in hexanes, 1.65 mmol, 1.00 eq.) was dissolved in THF (20 mL) and filled into a Schlenk tube. The solution was cooled to -78 °C using a dry ice/acetone bath and *n*-butyllithium (1.03 mL, 1.6 M in hexanes, 1.65 mmol, 1.00 eq.) was added to the solution. The mixture was stirred at -78 °C for 30 min and subsequently transferred (via a PTFE cannula) into a separate Schlenk flask containing a stirred suspension of **1a** (758 mg, 1.65 mmol, 1.00 eq.) in THF (30 mL), also cooled to -78 °C. The mixture was stirred for 80 min at -78 °C, then warmed to 0 °C via an ice/water bath. While keeping the mixture cold, all volatiles were removed *in vacuo* and, subsequently, ice-cold *n*-hexane was added to the residue. The mixture was stirred for 5 minutes and then filtered into another Schlenk flask (via a PTFE cannula plugged with a glass filter). An orange solution was obtained (Figure S 7, left). The solution was irradiated with UV light (365 nm) for 3 h. Yellow crystals formed at the bottom of the Schlenk flask (Figure S 7, right). The mother liquor was pipetted off, the crystals washed four times with *n*-hexane (1.5 mL) and dried *in vacuo* at room temperature (Figure S 8).

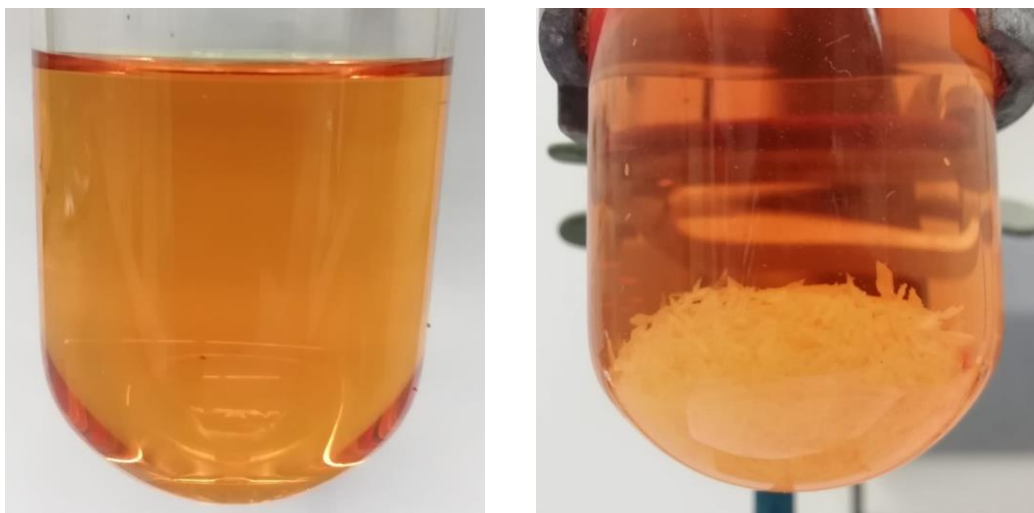

Figure S 7: *n*-Hexane solution before (left) and after irradiation (right).

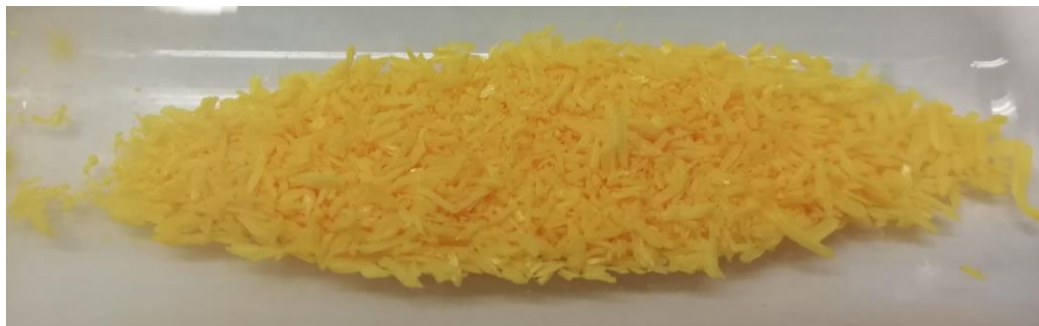

Figure S 8: Isolated crystals of **3a**.



**Yield:** 218 mg (0.427 mmol, 26%).

Note: The NMR signals were assigned using 2D NMR experiments (*vide infra*).

**$^1\text{H}$  NMR (400 MHz,  $\text{C}_6\text{D}_6$ ):**  $\delta$  = 2.76 (s, 8 H, N-CH<sub>2</sub>-CH<sub>2</sub>-N), 1.55 (s, 36 H, *t*Bu), 0.56 (d,  $^4J_{\text{HP}}$  = 1.2 Hz, 9 H, SiMe<sub>3</sub>),.

**$^{13}\text{C}\{^1\text{H}\}$  NMR (101 MHz,  $\text{C}_6\text{D}_6$ ):**  $\delta$  = 153.1 (d,  $^2J_{\text{CP}}$  = 16 Hz, C=N-P), 75.1 (d,  $^1J_{\text{CP}}$  = 49 Hz, P-C), 54.7 ( $\text{CMe}_3$ ), 42.0 (N-CH<sub>2</sub>-CH<sub>2</sub>-N), 29.2 ( $\text{C}(\text{CH}_3)_3$ ), 5.6 (d,  $^3J_{\text{CP}}$  = 14 Hz, SiMe<sub>3</sub>).

**$^{29}\text{Si}\{^1\text{H}\}$  NMR (80 MHz,  $\text{C}_6\text{D}_6$ ):**  $\delta$  = -21.4 (d,  $^2J_{\text{SiP}}$  = 41 Hz).

**$^{31}\text{P}$  NMR (202 MHz,  $\text{C}_6\text{D}_6$ ):**  $\delta$  = -7.3.

**HR-MS (ESI):** Calculated for  $[\text{C}_{23}\text{H}_{46}\text{N}_6\text{O}_2\text{P}]^+$  ( $[\mathbf{3a}+\text{H}+\text{O}+\text{OH}-\text{SiMe}_3]^+$ ):  $m/z$  = 469.34144, found:  $m/z$  = 469.37502; calculated for  $[\text{C}_{23}\text{H}_{46}\text{N}_6\text{O}_2\text{P}]^+$  ( $[\mathbf{3a}+\text{H}+\text{O}_2]^+$ ):  $m/z$  = 541.3810, found:  $m/z$  = 541.41399.

**Elemental analysis:** Calculated for  $\text{C}_{26}\text{H}_{53}\text{N}_6\text{PSi}$  (**3a**): C 61.38 %, H 10.50 %, N 16.52 %, found: C 61.14 %, H 10.48 %, N 16.61 %.

**Melting point:** 172°C (decomposition).

**Single crystal X-ray diffraction analysis:** Single crystals suitable for X-ray diffraction analysis were obtained during the synthesis (*vide supra*). The structure of **3a** was confirmed.

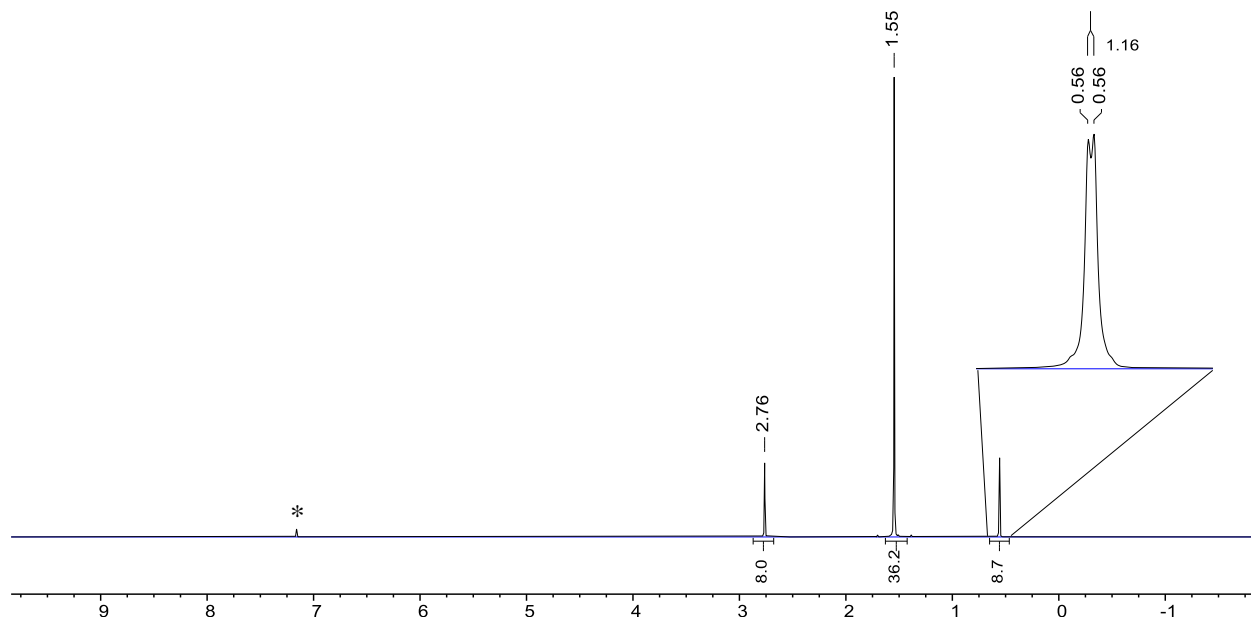

Figure S 9:  $^1\text{H}$  NMR (400 MHz, 300K) spectrum of **3a** in  $\text{C}_6\text{D}_6$ . The asterisk (\*) marks the solvent signal.

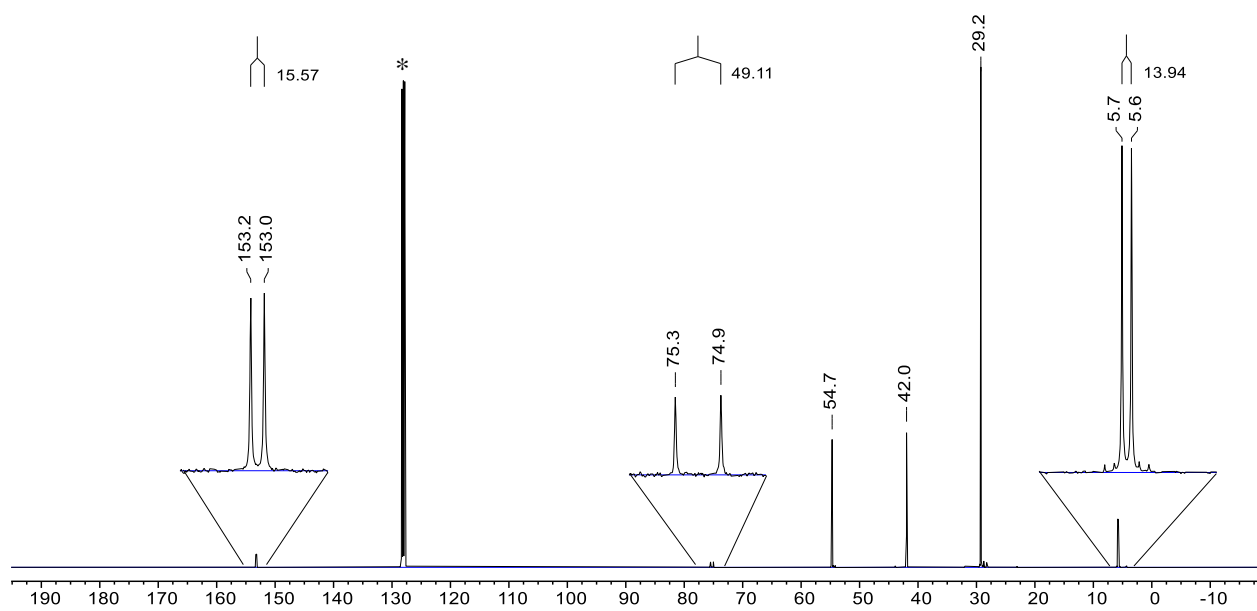

Figure S 10:  $^{13}\text{C}\{^1\text{H}\}$  NMR (101 MHz, 300K) spectrum of **3a** in  $\text{C}_6\text{D}_6$ . The asterisk (\*) marks the solvent signal.

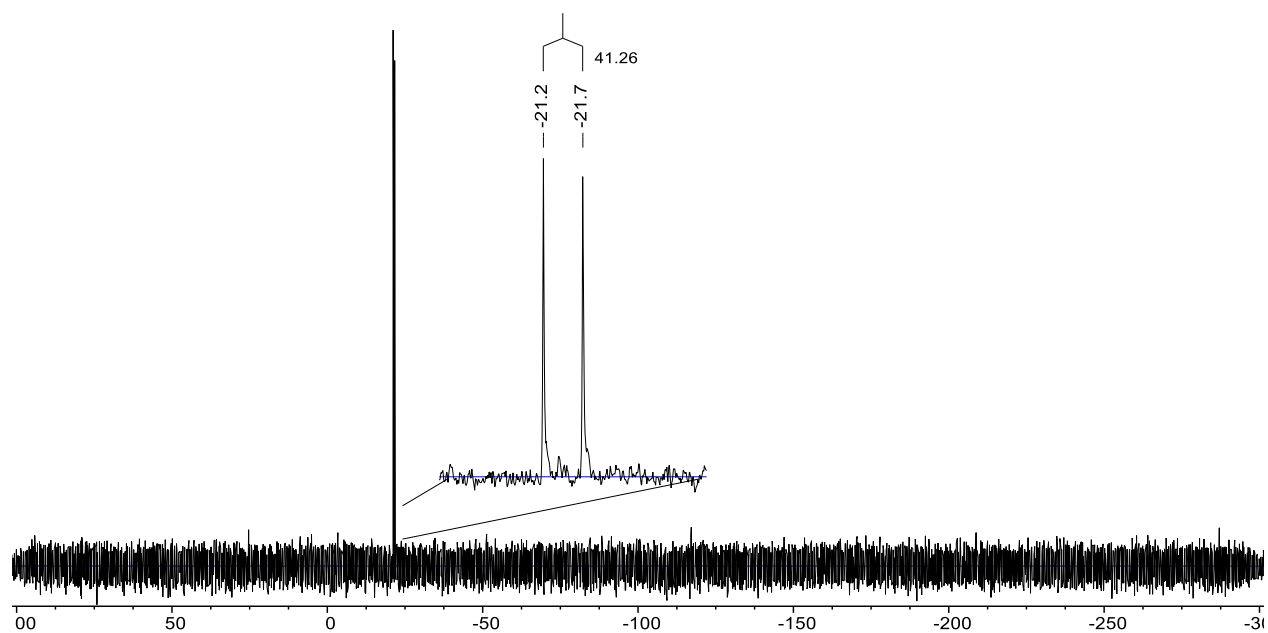

Figure S 11:  $^{29}\text{Si}\{^1\text{H}\}$  NMR (80 MHz, 300K) spectrum of **3a** in  $\text{C}_6\text{D}_6$ .

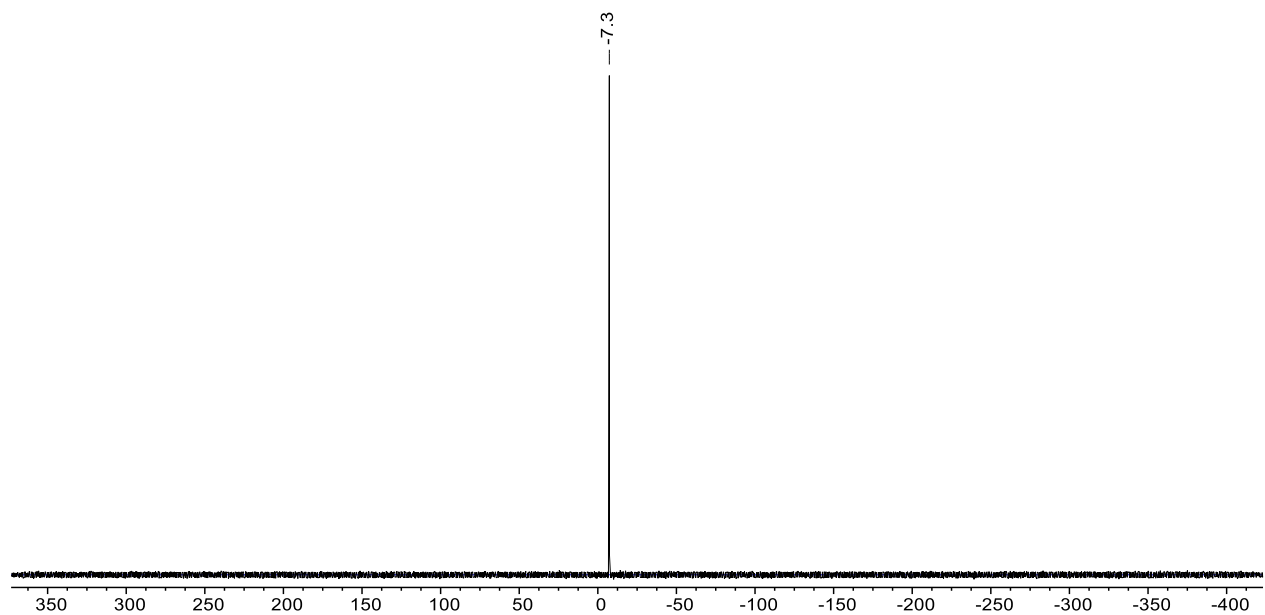

Figure S 12:  $^{31}\text{P}$  NMR (202 MHz, 300K) spectrum of **3a** in  $\text{C}_6\text{D}_6$ .

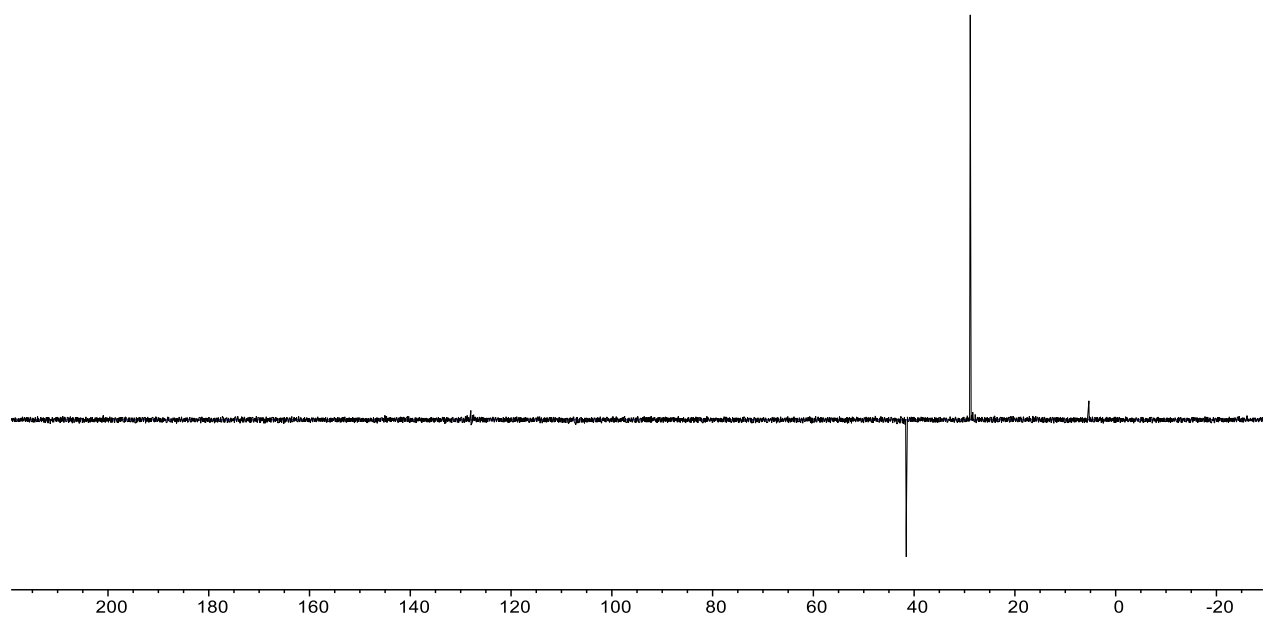

Figure S 13:  $^{13}\text{C}\{^1\text{H}\}$  DEPT 135 NMR (101 MHz, 300K) spectrum of **3a** in  $\text{C}_6\text{D}_6$ .

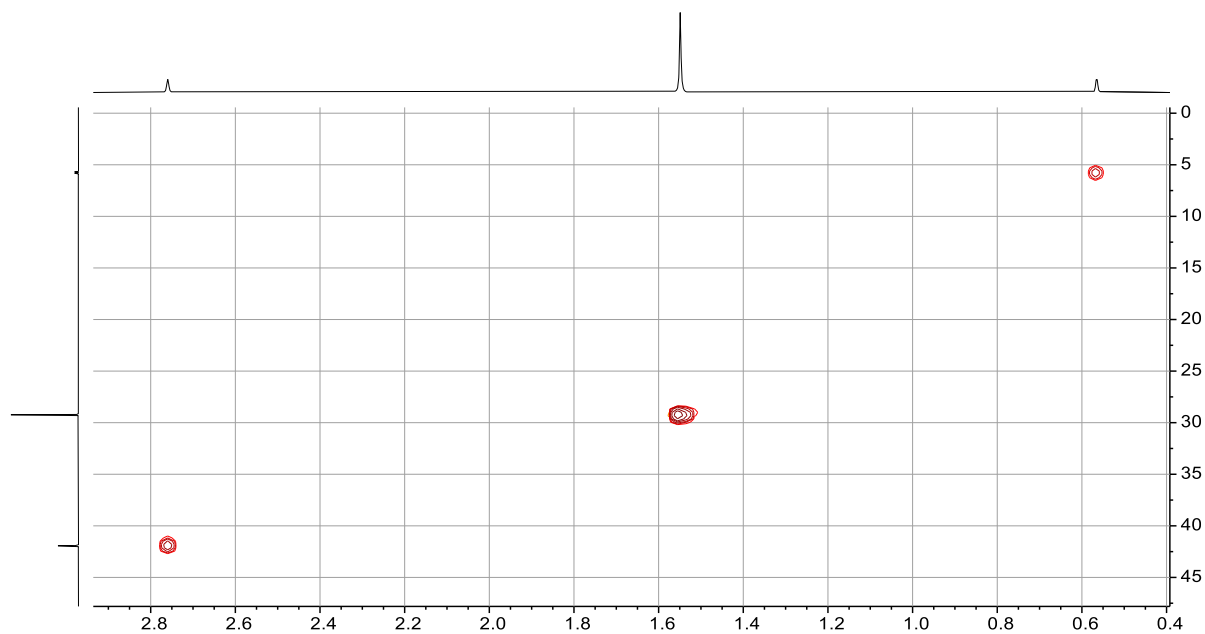

Figure S 14:  $^1\text{H}/^{31}\text{C}\{^1\text{H}\}$  HSQC NMR spectrum of **3a** in  $\text{C}_6\text{D}_6$  (excerpt). No spots are present outside of the shown area.

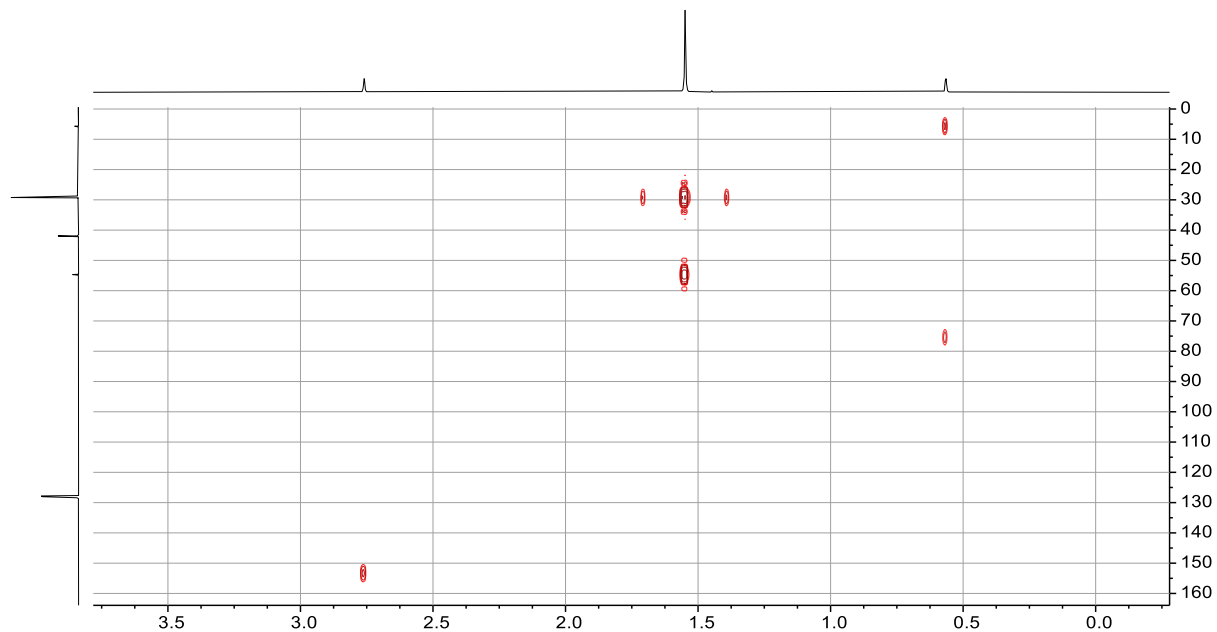

Figure S 15:  $^1\text{H}/^{31}\text{C}\{^1\text{H}\}$  HMBC NMR spectrum of **3a** in  $\text{C}_6\text{D}_6$ .

### 1.3 Preparation of **3b**

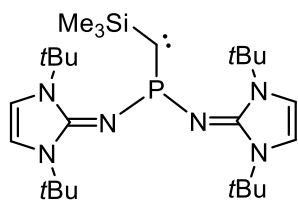

Note: Until the irradiation step, this reaction was performed in the dark.

A solution of (trimethylsilyl)diazomethane (2M in hexane, 0.9 mL, 1.80 mmol, 1.00 eq.) in THF (10 mL) was cooled to -78 °C using a dry ice/acetone bath and n-butyllithium (1.13 mL, 1.6 M in hexanes, 1.80 mmol, 1.00 eq.) was added to the solution. The mixture was stirred at -78 °C for 20 min and subsequently transferred (via a PTFE cannula) into a separate Schlenk flask containing a stirred suspension of **1b** (819 mg, 1.80 mmol, 1.00 eq.) in THF (30 mL) at -78 °C. After gradually warming the reaction mixture to 0 °C, the now clear solution was evaporated *in vacuo* and the residue extracted with hexane (3 x 10 mL). After exposure to sunlight for three consecutive cloudy days, crystals of the carbene **3b** formed. The supernatant hexane solution was decanted and the crystals washed with hexane (3 x 5 mL). After evaporation of the solvent, yellow, needle-like crystals of **3b** (229 mg, 0.45 mmol, 25%) could be obtained.

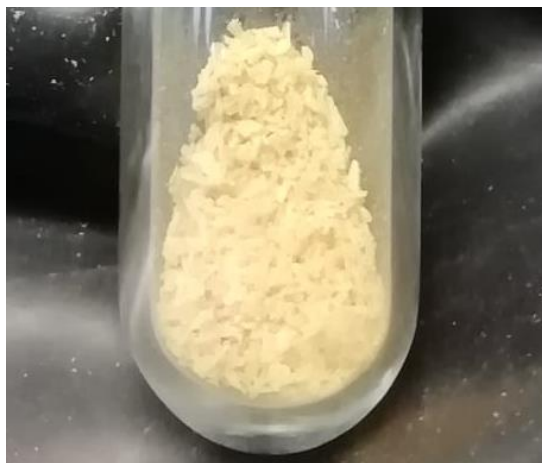

Figure S 16: Isolated crystals of **3b**.

**Yield:** 229 mg (0.45 mmol, 25%).

**<sup>1</sup>H NMR (400 MHz, C<sub>6</sub>D<sub>6</sub>):**  $\delta$  = 6.14 (s, 4 H, N-CH=CH-N), 1.73 (s, 36 H, *t*Bu), 0.38 (d, <sup>4</sup>*J*<sub>HP</sub> = 1.0 Hz, 9 H, SiMe<sub>3</sub>).

**<sup>13</sup>C{<sup>1</sup>H} NMR (126 MHz, C<sub>6</sub>D<sub>6</sub>):**  $\delta$  = 145.6 (d, <sup>2</sup>*J*<sub>CP</sub> = 12 Hz, C=N-P), 110.0 (N-CH=CH-N), 77.4 (d, <sup>1</sup>*J*<sub>CP</sub> = 47 Hz, P-C), 55.2 (CMe<sub>3</sub>) 29.8 (C(CH<sub>3</sub>)<sub>3</sub>), 5.5 (d, <sup>3</sup>*J*<sub>CP</sub> = 13 Hz, SiMe<sub>3</sub>).

**<sup>29</sup>Si{<sup>1</sup>H} DEPT 19.5 NMR (99 MHz, C<sub>6</sub>D<sub>6</sub>):**  $\delta$  = -22.3 (d, <sup>2</sup>*J*<sub>SiP</sub> = 41 Hz).

**<sup>31</sup>P NMR (162 MHz, C<sub>6</sub>D<sub>6</sub>):**  $\delta$  = 19.9.

**Elemental analysis:** Calculated for C<sub>26</sub>H<sub>49</sub>N<sub>6</sub>PSi (**3b**): C 61.87 %, H 9.78 %, N 16.65 %, found: C 61.87 %, H 9.91 %, N 16.80 %.

**HR-MS (ESI):** Calculated for  $[\text{C}_{23}\text{H}_{42}\text{N}_6\text{O}_2\text{P}]^+$  ( $[\mathbf{3b}+\text{H}+\text{O}+\text{OH}-\text{SiMe}_3]^+$ ):  $m/z = 465.31014$ , found:  $m/z = 465.34439$ ; calculated for  $[\text{C}_{26}\text{H}_{50}\text{N}_6\text{O}_2\text{PSi}]^+$  ( $[\mathbf{3b}+\text{O}_2+\text{H}]^+$ ):  $m/z = 537.34966$ , found:  $m/z = 537.38512$ .

**Melting point:** 170°C (decomposition).

**Single crystal X-ray diffraction analysis:** Single crystals suitable for X-ray diffraction analysis were obtained during the synthesis (*vide supra*). The structure of **3b** was confirmed.

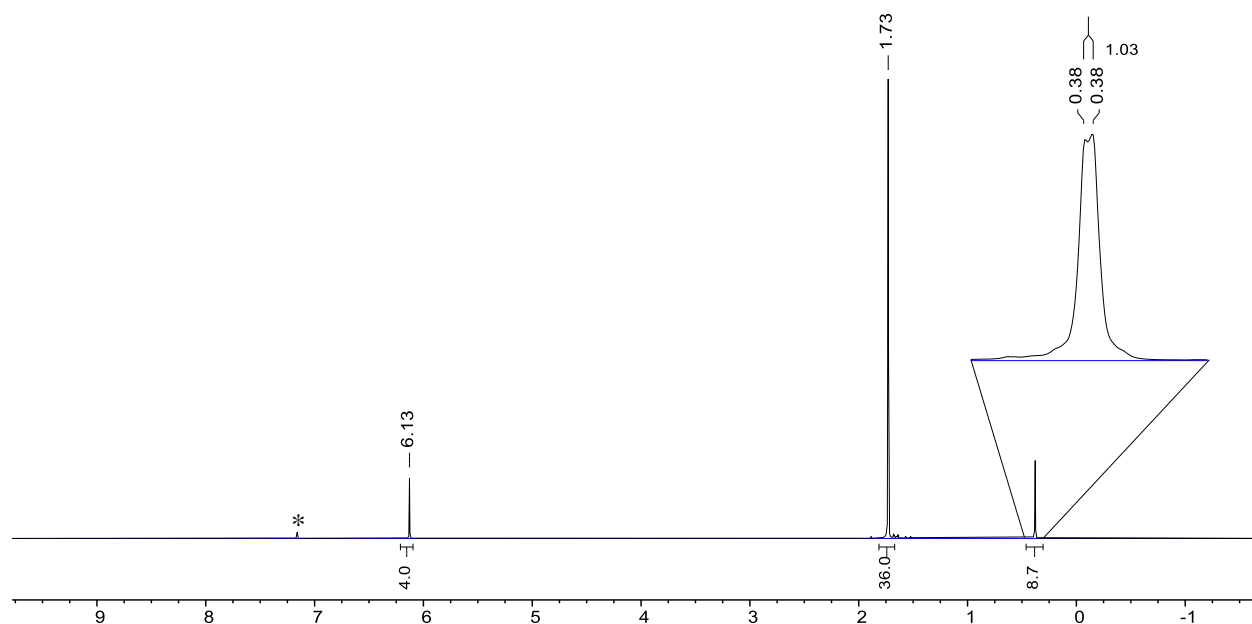

Figure S 17:  $^1\text{H}$  NMR (400 MHz, 300K) spectrum of **3b** in  $\text{C}_6\text{D}_6$ . The asterisk (\*) marks the solvent signal.

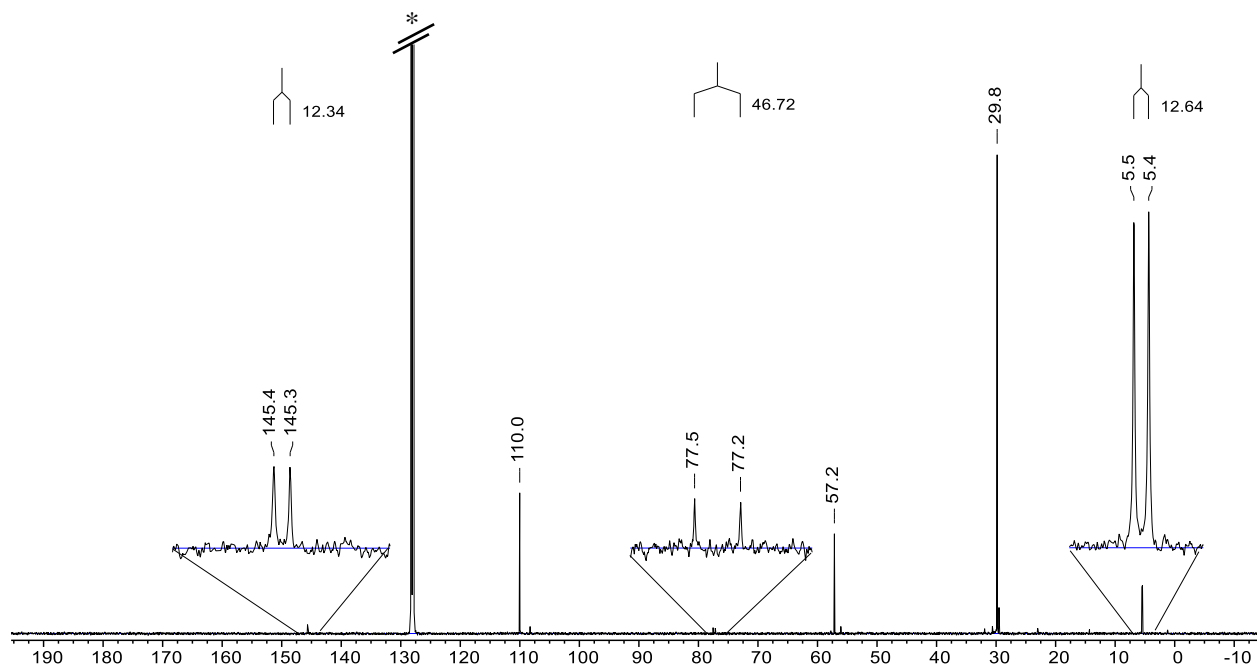

Figure S 18:  $^{13}\text{C}\{^1\text{H}\}$  NMR (126 MHz, 300K) spectrum of **3b** in  $\text{C}_6\text{D}_6$ . The asterisk (\*) marks the solvent signal. The solvent signal has been cut off due to the very low intensity of some sample signals.

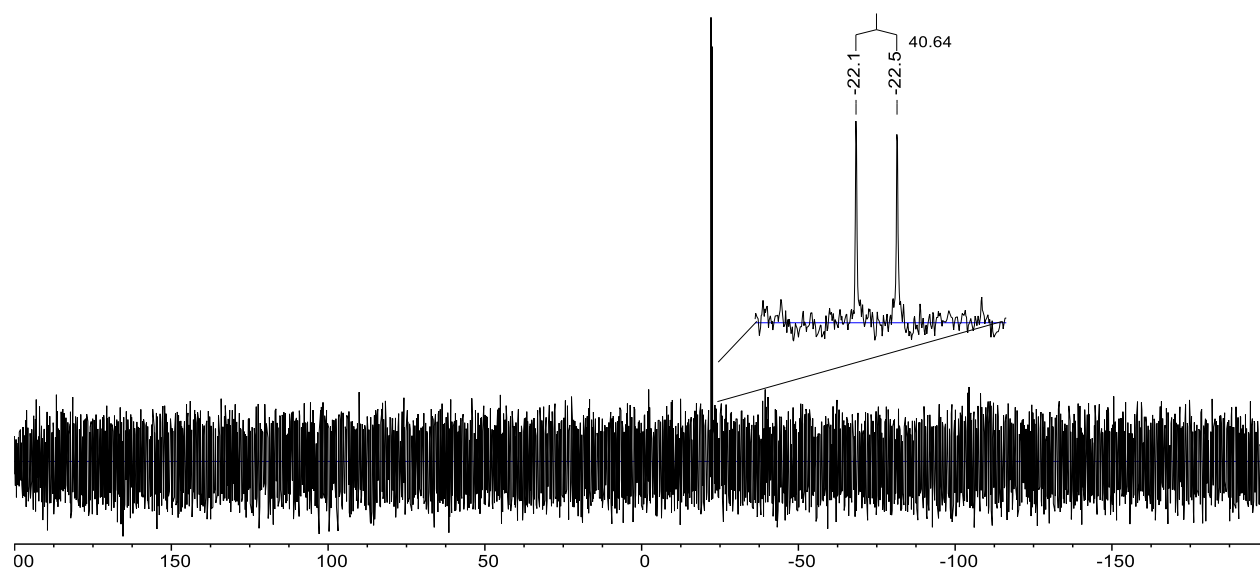

Figure S 19:  $^{29}\text{Si}\{^1\text{H}\}$  DEPT 19.5 NMR (99 MHz, 300K) spectrum of **3b** in  $\text{C}_6\text{D}_6$ .

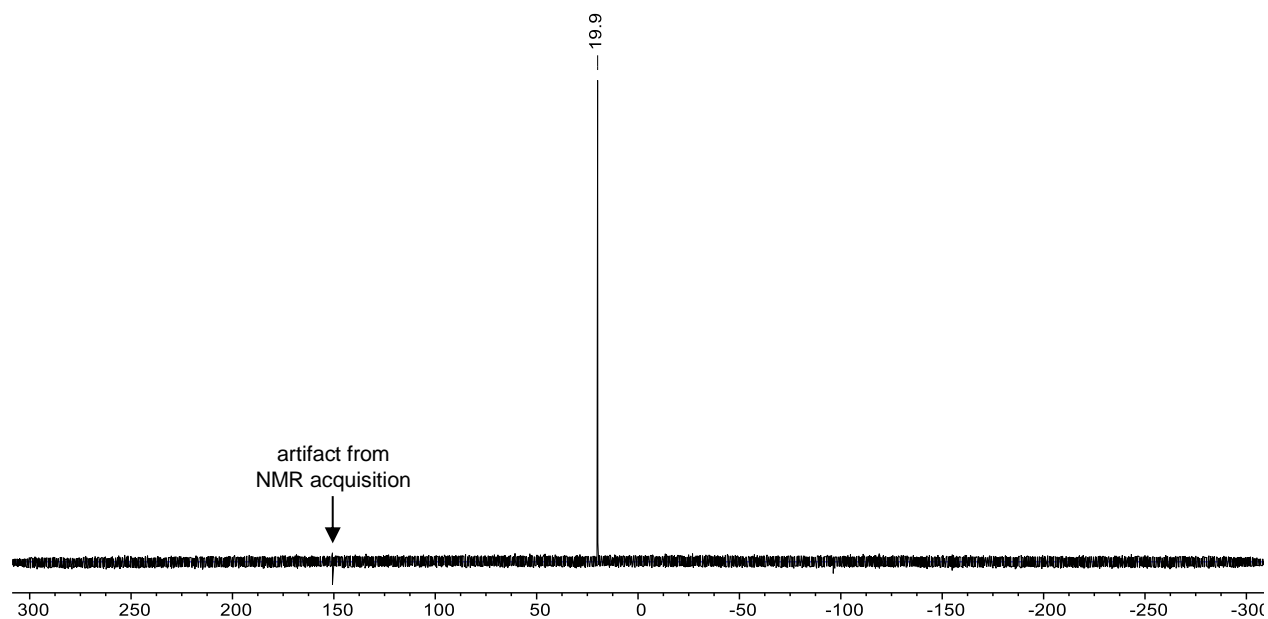

Figure S 20:  $^{31}\text{P}$  NMR (162 MHz, 300K) spectrum of **3b** in  $\text{C}_6\text{D}_6$ .



## 1.4 Preparation of **4**

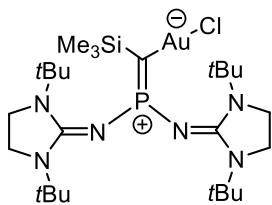

Note: The reaction, as well as storage of the product, were conducted in the dark.

**3a** (100 mg, 0.197 mmol, 1.00 eq.) and chloro(tetrahydrothiophene)gold(I) (63 mg, 0.197 mmol, 1.00 eq.) were added into a vial. While stirring the mixture, THF (3 mL) was added and the suspension stirred for 30 minutes at 21 °C. Afterwards, the slightly cloudy suspension was passed through a glass filter and all volatiles of the yellow solution were removed *in vacuo*. The product is obtained as a light yellow solid.

**Yield:** 141 mg (0.190 mmol, 97%).

Note: Optionally, **4** can be recrystallized by storing a concentrated THF solution at -35 °C for one week.

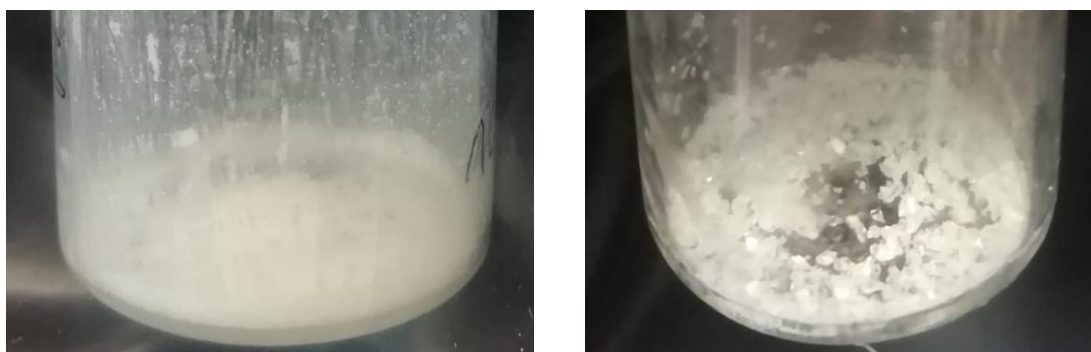

Figure S 21: **4** as obtained from the reaction (left) and recrystallized (right).

Remarks on the thermal stability of **4**: Gradual heating of solid **4** in the melting point apparatus resulted in slow color change from light yellow to purple starting at 137 °C, indicating thermal decomposition. In a separate experiment, a solution of **4** in THF was gradually heated. Heating at 60 °C for 2 h resulted in slight precipitation of a purple solid, indicating slow thermal decomposition. Further heating at 80 °C showed greatly accelerated decomposition.

Note: The NMR signals were assigned using 2D NMR and <sup>31</sup>P decoupled experiments (*vide infra*).

**<sup>1</sup>H NMR (400 MHz, THF-*d*<sub>8</sub>):** δ = 4.00–3.95 (m, 2 H, N-CH<sub>2</sub>-CH<sub>2</sub>-N), 3.50–3.46 (m, 6 H, N-CH<sub>2</sub>-CH<sub>2</sub>-N), 1.53 (s, 18 H, *t*Bu), 1.49 (s, 18 H, *t*Bu), 0.07 (d, <sup>4</sup>*J*<sub>HP</sub> = 1.0 Hz, 9 H, SiMe<sub>3</sub>).

**<sup>13</sup>C{<sup>1</sup>H} NMR (101 MHz, THF-*d*<sub>8</sub>):** δ = 159.8 (d, <sup>2</sup>*J*<sub>CP</sub> = 13 Hz, C=N-P), 152.1 (d, <sup>2</sup>*J*<sub>CP</sub> = 20 Hz, C=N-P), 56.2 (CMe<sub>3</sub>), 55.6 (CMe<sub>3</sub>), 53.3 (d, <sup>1</sup>*J*<sub>CP</sub> = 89 Hz, P-C), 43.0 (N-CH<sub>2</sub>-CH<sub>2</sub>-N), 42.5 (N-CH<sub>2</sub>-CH<sub>2</sub>-N), 29.4 (C(CH<sub>3</sub>)<sub>3</sub>), 28.8 (C(CH<sub>3</sub>)<sub>3</sub>), 4.8 (d, <sup>3</sup>*J*<sub>CP</sub> = 9 Hz, SiMe<sub>3</sub>).

**<sup>29</sup>Si{<sup>1</sup>H} NMR (79 MHz, THF-*d*<sub>8</sub>):** δ = -11.5 (d, <sup>2</sup>*J*<sub>SiP</sub> = 24 Hz).

**<sup>31</sup>P NMR (162 MHz, THF-*d*<sub>8</sub>):** δ = 70.0.

**HR-MS (ESI):** Calculated for [C<sub>26</sub>H<sub>54</sub>AuClN<sub>6</sub>PSi]<sup>+</sup> ([**4**+H]<sup>+</sup>): *m/z* = 741.32548, found: *m/z* = 741.32654; calculated for [C<sub>26</sub>H<sub>53</sub>AuClN<sub>6</sub>NaPSi]<sup>+</sup> ([**4**+Na]<sup>+</sup>): *m/z* = 763.30848, found: *m/z* = 763.30710.

**Elemental analysis:** Calculated for  $C_{26}H_{53}AuClN_6PSi$  (**4**): C 42.13 %, H 7.21 %, N 11.34 %, found: C 42.36 %, H 7.25 %, N 11.41 %. Note: Elemental analysis data was acquired from the recrystallized product.

**Single crystal X-ray diffraction analysis:** Single crystals suitable for X-ray diffraction analysis were obtained by storing the filtrated reaction mixture at  $-35\text{ }^{\circ}\text{C}$  for one week. The structure of **4** was confirmed.

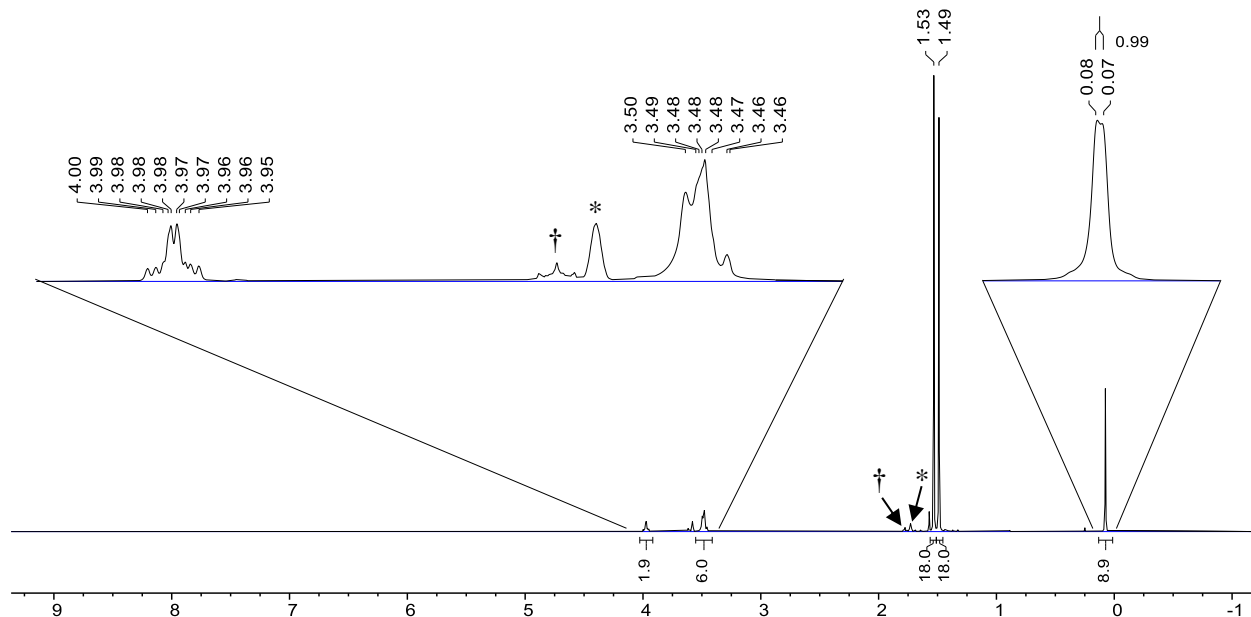

Figure S 22:  $^1\text{H}$  NMR spectrum (400 MHz, 300 K) of **4** in  $\text{THF-}d_8$ . The asterisks (\*) and daggers (†) mark the signals corresponding to  $\text{THF-}d_7$  and THF, respectively.

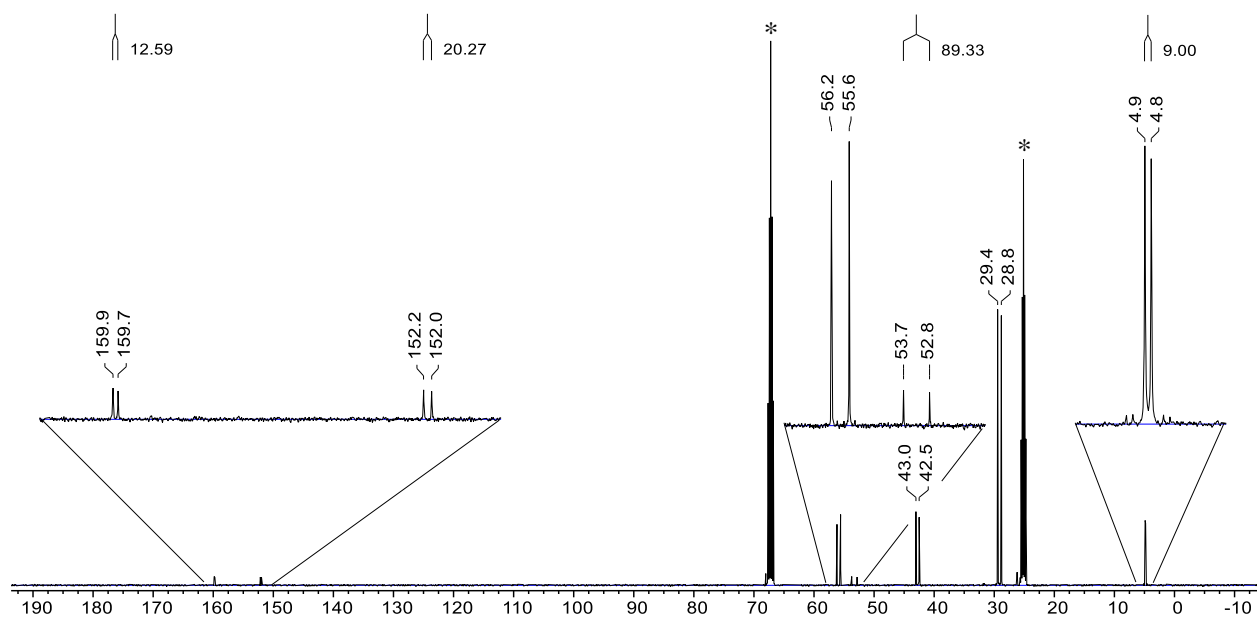

Figure S 23:  $^{13}\text{C}\{^1\text{H}\}$  NMR spectrum (101 MHz, 300 K) of **4** in  $\text{THF-}d_8$ . The asterisks (\*) mark the solvent signals.

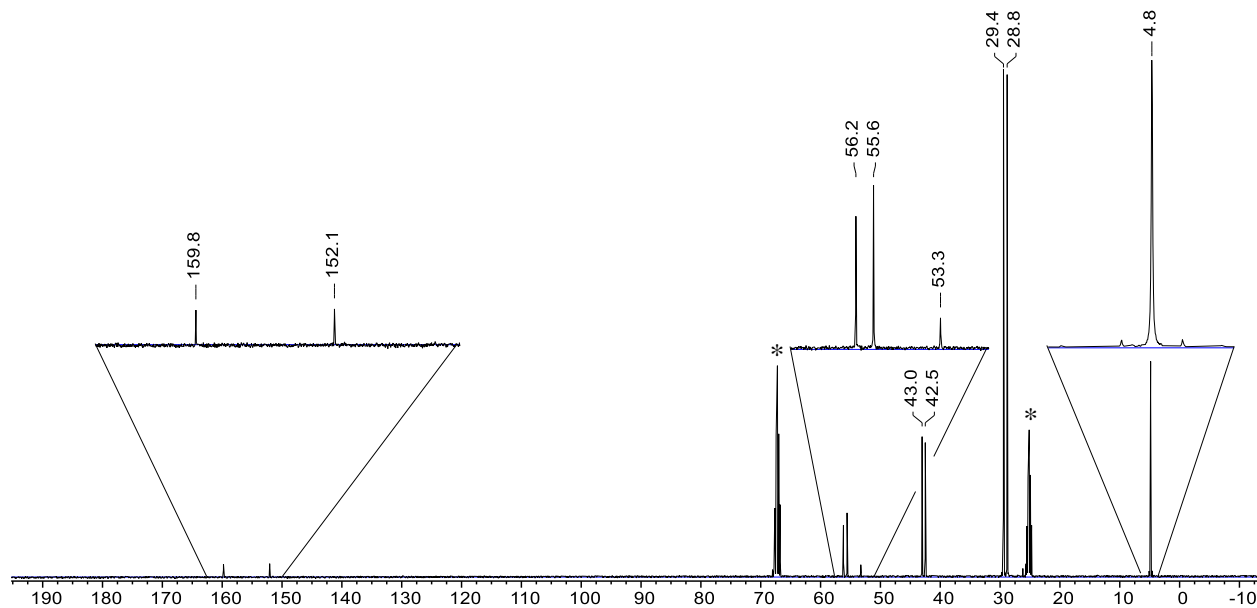

Figure S 24:  $^{13}\text{C}\{^1\text{H}, ^{31}\text{P}\}$  NMR spectrum (101 MHz, 300 K) of **4** in  $\text{THF-}d_8$ . The asterisks (\*) mark the solvent signals.

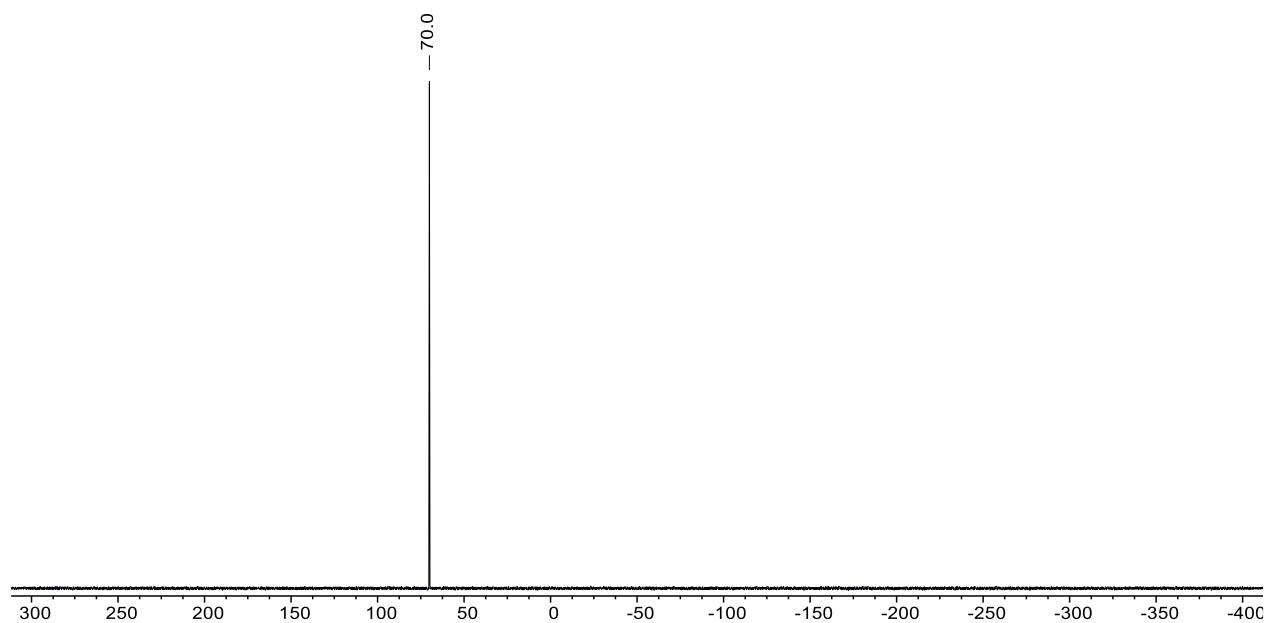

Figure S 25:  $^{31}\text{P}$  NMR spectrum (162 MHz, 300 K) of **4** in  $\text{THF-}d_8$ .

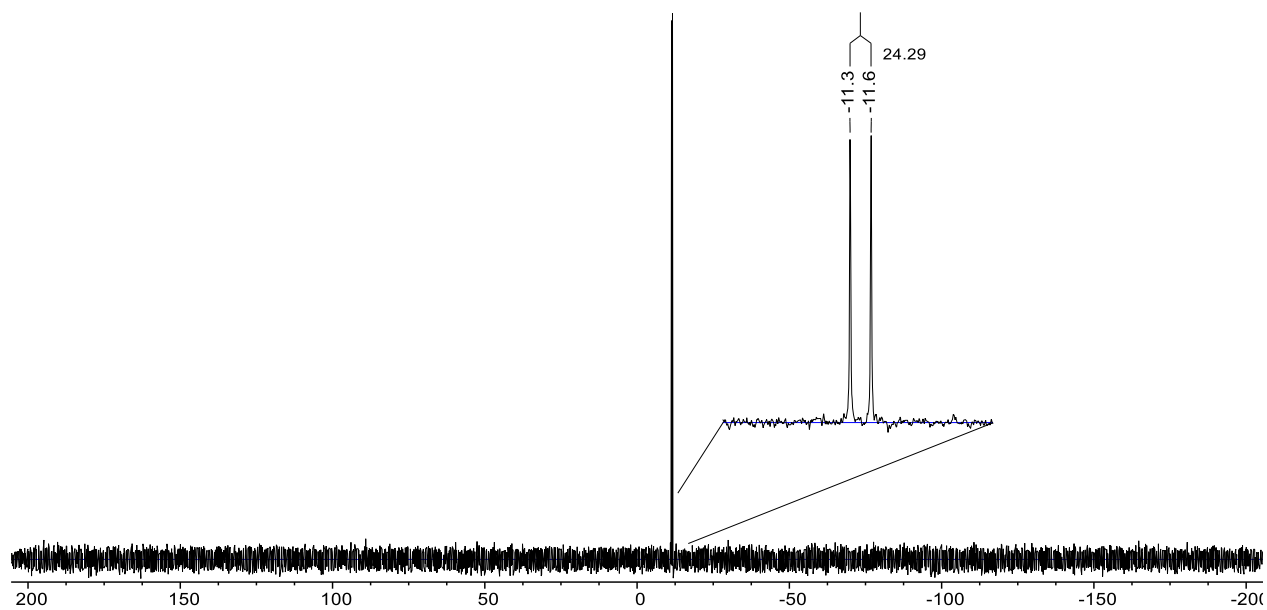

Figure S 26:  $^{29}\text{Si}\{^1\text{H}\}$  DEPT 19.5 NMR spectrum (79 MHz, 300 K) of **4** in  $\text{THF-}d_8$ .

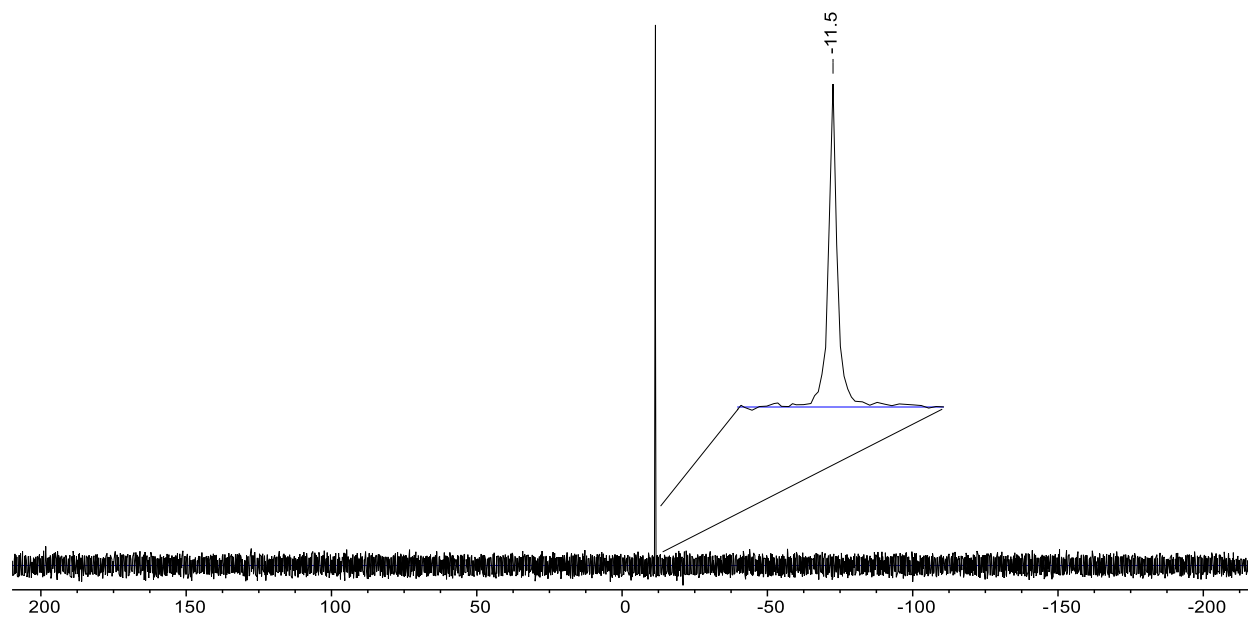

Figure S 27:  $^{29}\text{Si}\{^1\text{H}, ^{31}\text{P}\}$  DEPT 19.5 NMR spectrum (79 MHz, 300 K) of **4** in  $\text{THF-}d_8$ .

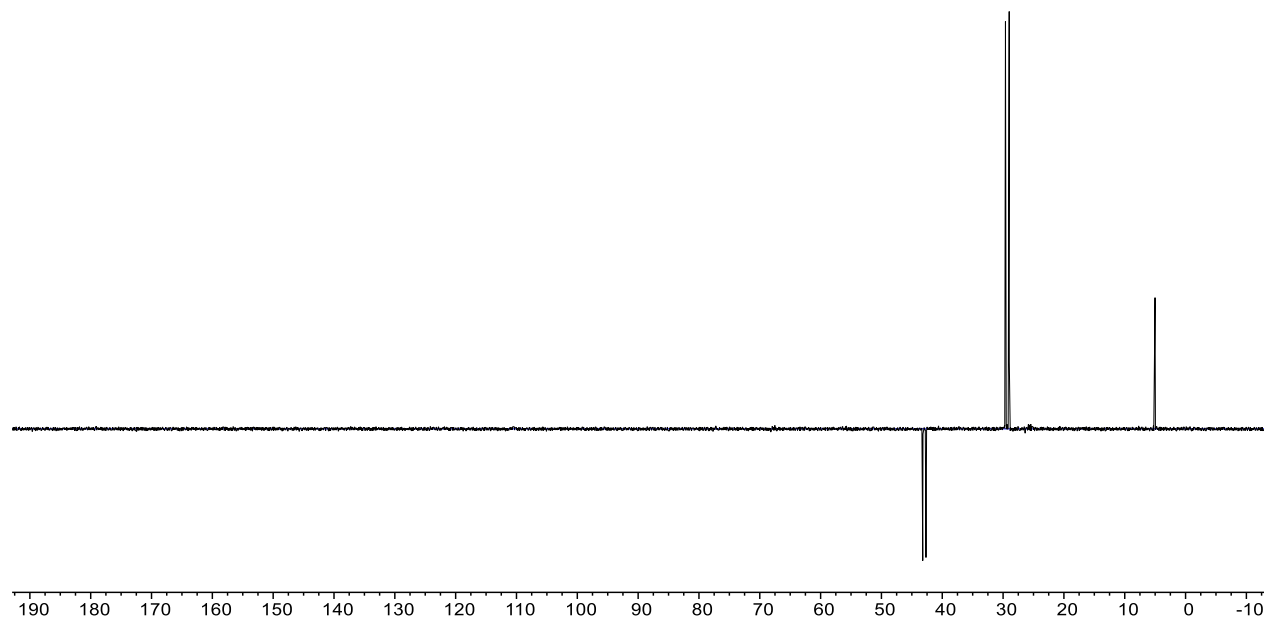

Figure S 28:  $^{13}\text{C}\{^1\text{H}\}$  DEPT 135 NMR (101 MHz, 300K) spectrum of **4** in  $\text{THF-}d_8$ .

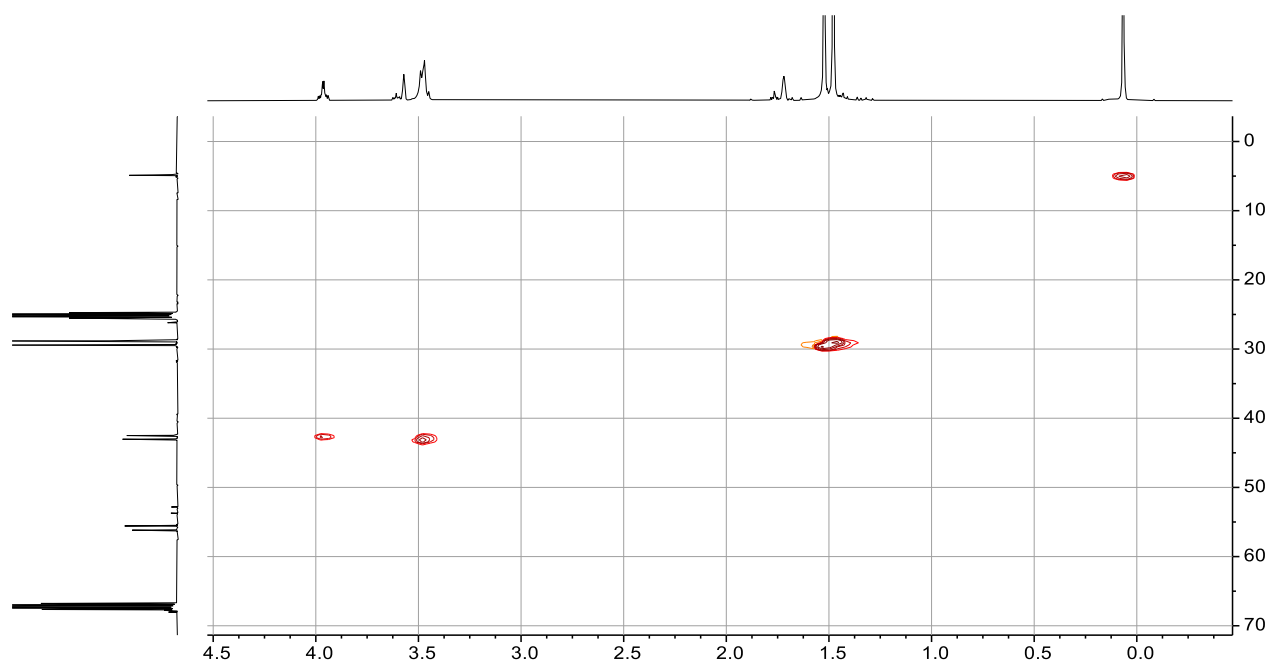

Figure S 29:  $^1\text{H}/^{13}\text{C}\{^1\text{H}\}$  HSQC NMR spectrum of **4** in  $\text{THF-}d_8$  (excerpt). No spots are present outside of the shown area. The correlation resonances corresponding to the solvent are too weak to be seen at the given amplification level.

## 1.5 Preparation of **6**

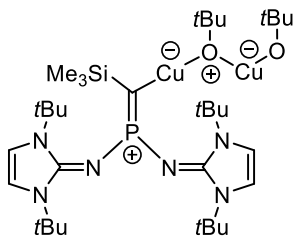

**3b** (30.0 mg, 0.0590 mmol, 1.00 eq.) and CuOtBu (16.3 mg, 0.118 mmol, 2.00 eq.) were dissolved in THF-*d*<sub>8</sub> (0.5 mL) and filled into an NMR-tube. The mixture immediately changed colour from yellow to light beige. A purification was not necessary.

**NMR-Yield:** Quantitative.

Optionally, **6** can be isolated as a white solid in quantitative yield after removal of all volatiles *in vacuo*.

Note: The NMR signals were assigned using 2D NMR experiments (*vide infra*).

**<sup>1</sup>H NMR (400 MHz, THF-*d*<sub>8</sub>):** δ = 7.15 (s, 2 H, N-CH-CH-N), 6.82 (s, 2 H, N-CH-CH-N), 1.85 (s, 18 H, N-*t*Bu), 1.73 (s, 18 H, N-*t*Bu), 1.25 (s, 9 H, O-*t*Bu), 1.14 (s, 9 H, O-*t*Bu), -0.12 (s, 9 H, SiMe<sub>3</sub>).

**<sup>13</sup>C{<sup>1</sup>H} NMR (101 MHz, THF-*d*<sub>8</sub>):** δ = 145.9 (d, <sup>2</sup>*J*<sub>CP</sub> = 10 Hz, C=N-P), δ = 142.6 (d, <sup>2</sup>*J*<sub>CP</sub> = 18 Hz, C=N-P), 114.0 (N-CH-CH-N), 111.5 (N-CH-CH-N), 72.0 (O-CMe<sub>3</sub>), 68.8 (O-CMe<sub>3</sub>), 59.0 (N-CMe<sub>3</sub>), 58.2 (N-CMe<sub>3</sub>), 53.1 (d, <sup>1</sup>*J*<sub>CP</sub> = 57 Hz, P-C), 37.0 (O-C(CH<sub>3</sub>)<sub>3</sub>), 36.4 (O-C(CH<sub>3</sub>)<sub>3</sub>), 29.9 (N-C(CH<sub>3</sub>)<sub>3</sub>), 29.3 (N-C(CH<sub>3</sub>)<sub>3</sub>), 5.1 (d, <sup>3</sup>*J*<sub>CP</sub> = 9 Hz, SiMe<sub>3</sub>).

**<sup>29</sup>Si{<sup>1</sup>H} NMR (80 MHz, THF-*d*<sub>8</sub>):** δ = -16.2 (d, <sup>2</sup>*J*<sub>SiP</sub> = 17 Hz).

**<sup>31</sup>P NMR (202 MHz, THF-*d*<sub>8</sub>):** δ = 80.8.

**Single crystal X-ray diffraction analysis:** Single crystals suitable for X-ray diffraction analysis were obtained by attempting the reaction in C<sub>6</sub>D<sub>6</sub>: After initial addition of the reactants, a suspension was obtained. The mixture was heated until dissolution of the precipitate and then let cool down. Colourless crystals were obtained. The structure of **6** was confirmed.

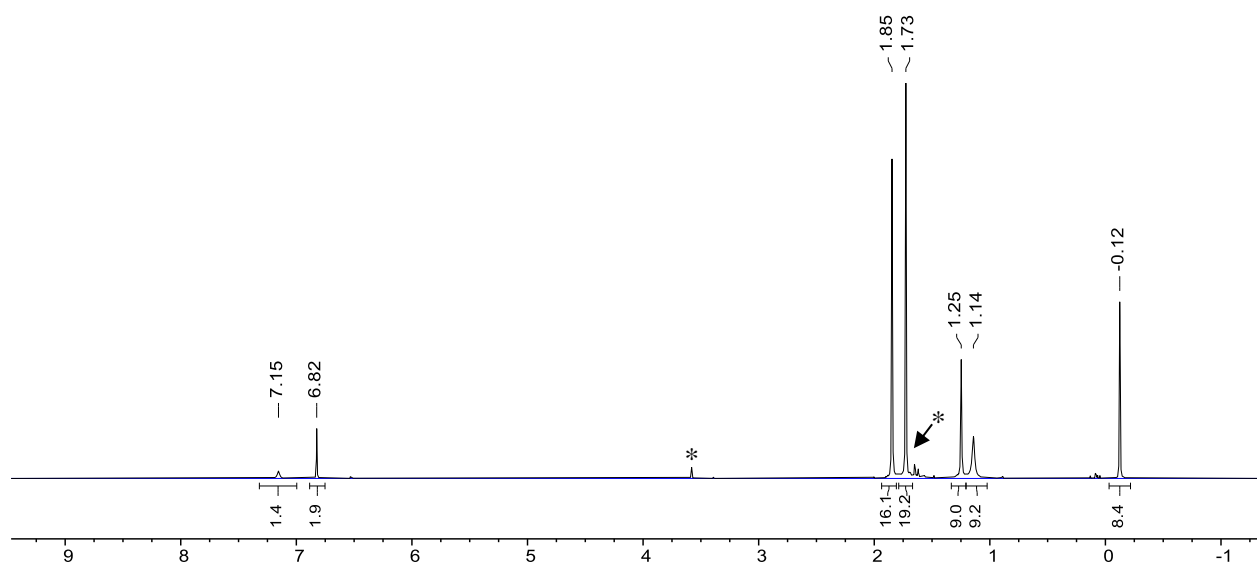

Figure S 30:  $^1\text{H}$  NMR spectrum (400 MHz, 300 K) of **6** in  $\text{THF-}d_8$ . The asterisks (\*) mark the solvent signals. Note: the solvent signal at  $\delta = 1.73$  ppm is overlayed by the signal corresponding to a *tert*-butyl group.

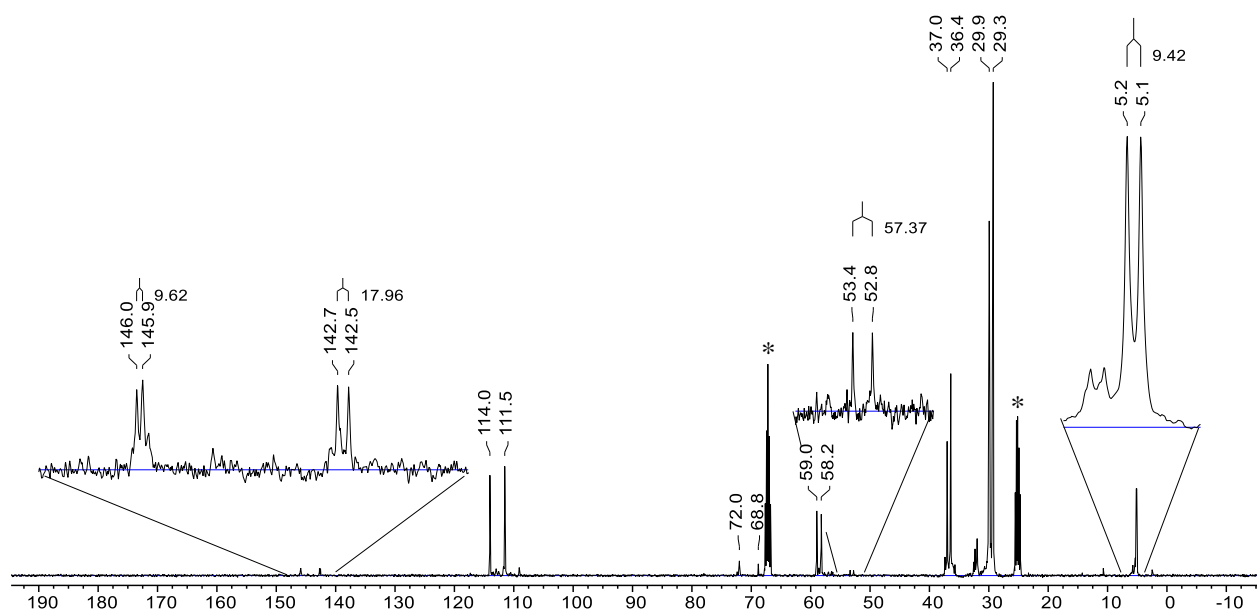

Figure S 31:  $^{13}\text{C}\{^1\text{H}\}$  NMR spectrum (101 MHz, 300 K) of **6** in  $\text{THF-}d_8$ . The asterisks (\*) mark the solvent signals.



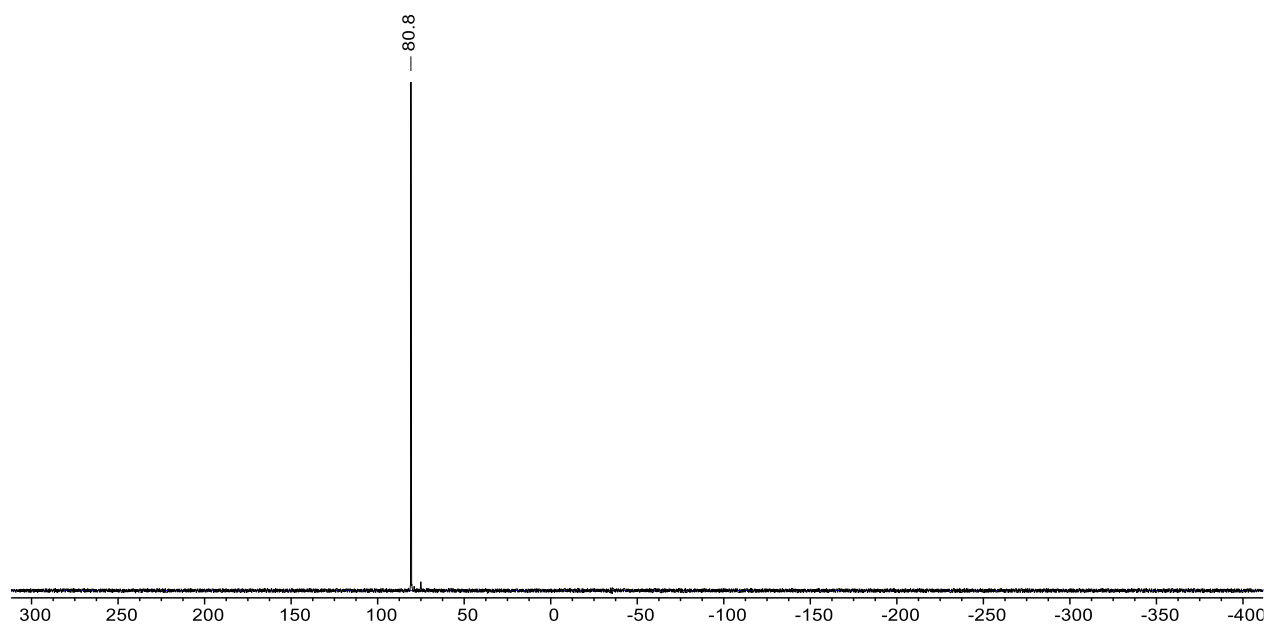

Figure S 32:  $^{31}\text{P}$  NMR spectrum (162 MHz, 300 K) of **6** in  $\text{THF-}d_8$ .

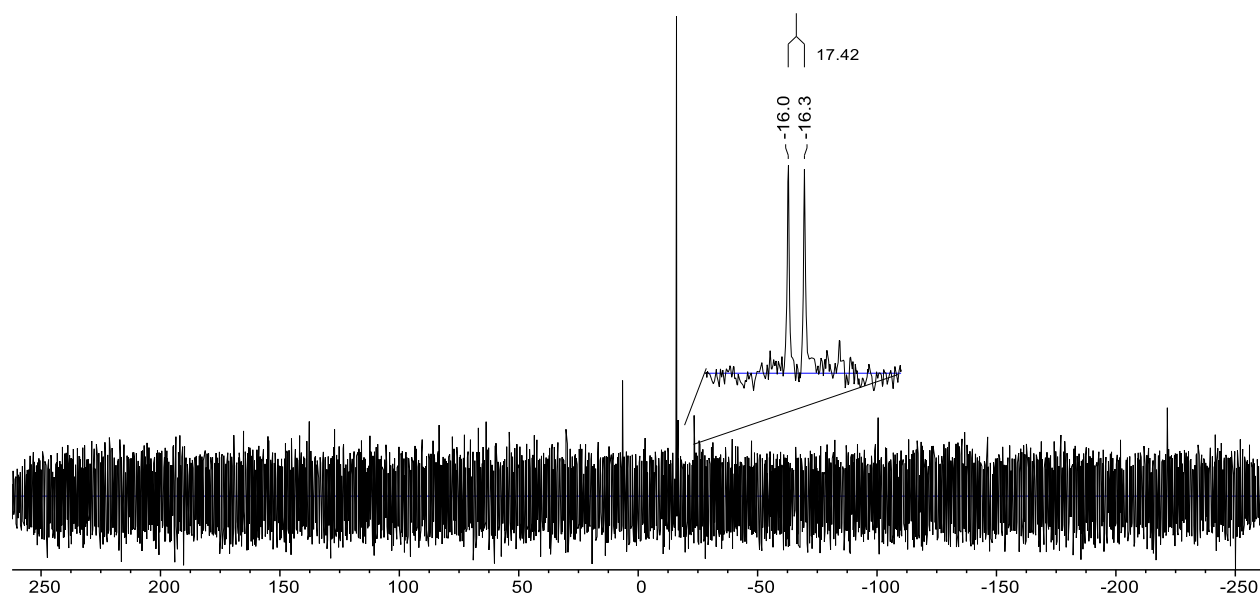

Figure S 33:  $^{29}\text{Si}\{^1\text{H}\}$  DEPT 19.5 NMR spectrum (79 MHz, 300 K) of **6** in  $\text{THF-}d_8$ .

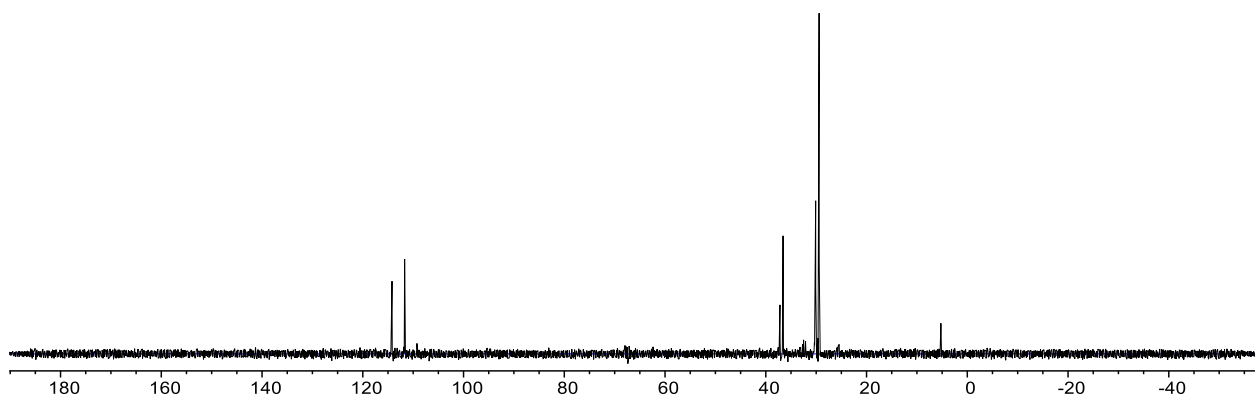

Figure S 34:  $^{13}\text{C}\{^1\text{H}\}$  DEPT 135 NMR spectrum (101 MHz, 300 K) of **6** in  $\text{THF-}d_8$ .

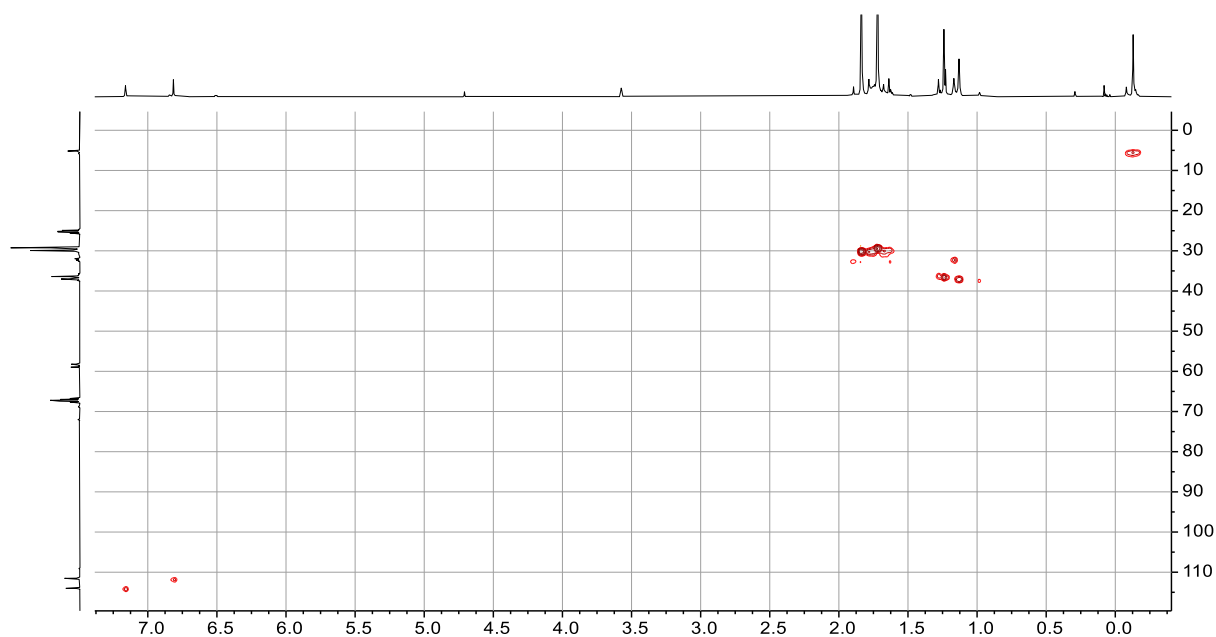

Figure S 35:  $^1\text{H}/^{13}\text{C}\{^1\text{H}\}$  HSQC NMR spectrum of **6** in  $\text{THF-}d_8$  (excerpt). No spots are present outside of the shown area. At the point of acquisition the compound partially decomposed in the NMR-tube, as seen by additional signals in the traces, presumably due to the presence of trace water or oxygen. The assignment of the product signals is not affected by this.

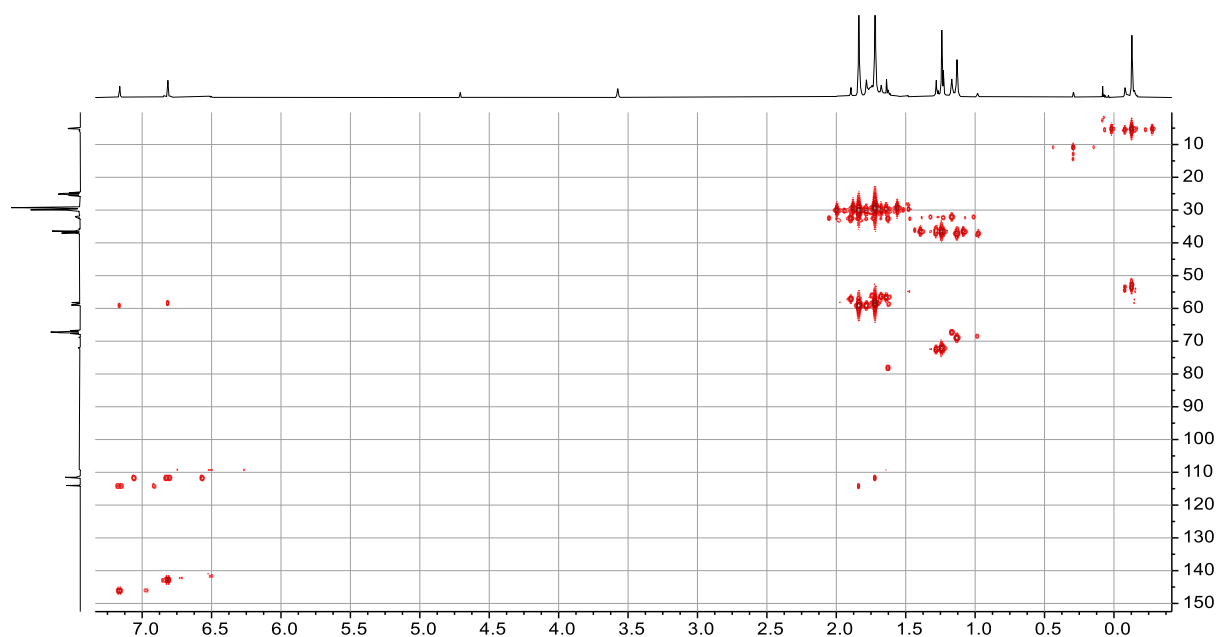

Figure S 36:  $^1\text{H}/^{13}\text{C}\{^1\text{H}\}$  HMQC NMR spectrum of **6** in  $\text{THF-}d_8$ . At the point of acquisition the compound partially decomposed in the NMR-tube, as seen by additional signals in the traces, presumably due to the presence of trace water or oxygen. The assignment of the product signals is not affected by this.

## 1.6 Crystallization of **7** and attempt of its targeted synthesis

Compound **5** was first prepared in THF. Due to its low solubility in this solvent, an attempt was made to recrystallize it in 1,2-difluorobenzene. Storage of the mixture for four months at 21 °C resulted in the formation of few crystals of **7**, which were analyzed via X-ray diffraction analysis (*vide infra*).

To obtain **7** in a targeted synthesis, **5** (approx. 50 mg) was first prepared in THF (1 mL) by mixing equimolar amounts of **3b** and CuO*t*Bu. The supernatant THF solution was pipetted off and discarded. The remaining mixture was suspended in 1,2-difluorobenzene (0.5 mL) and monitored via <sup>31</sup>P NMR spectroscopy. After 2 h at 21 °C, no reaction was observed. However, heating at 60 °C for 16 h resulted in the formation of several species as indicated by <sup>31</sup>P NMR spectroscopy. Hence, a selective synthesis of **7** was not successful

## 2 Determination of % $V_{\text{bur}}$ and steric maps

Computation of percent buried volume (%  $V_{\text{bur}}$ ) values and steric maps was performed via the SambVca 2.1 web application.<sup>5</sup> The sphere are centered at the gold atom. Bond radii are scaled by 1.17, the sphere radius is set to 3.5 Å (if not stated differently), mesh spacing for numerical integration is set to 0.10 Å, H atoms are not included in the calculations. The investigated compounds are summarized in Figure S 37. The computed %  $V_{\text{bur}}$  values are summarized in Table S 1. The steric maps are depicted in chapters 0 to 2.3.

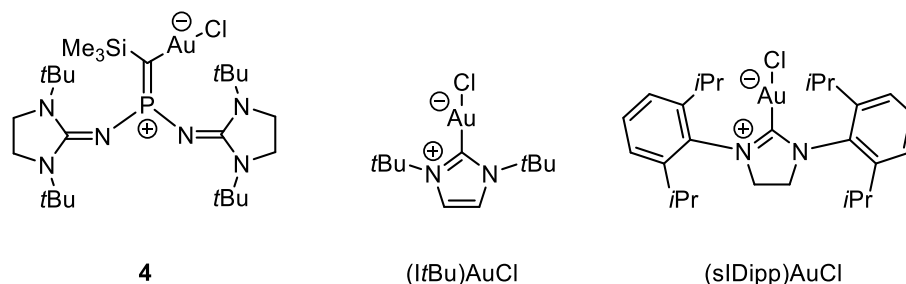

Figure S 37: Investigated gold complexes.<sup>6,7</sup>

Table S 1: Computed %  $V_{\text{bur}}$  values of the gold complexes shown in Figure S 37.

| Compound     | % $V_{\text{bur}}$ | Reference    |
|--------------|--------------------|--------------|
| <b>4</b>     | 50.1               |              |
| (ItBu)AuCl   | 39.3               | <sup>6</sup> |
| (sIDipp)AuCl | 47.4               | <sup>7</sup> |

## 2.1 Steric map of compound **4**

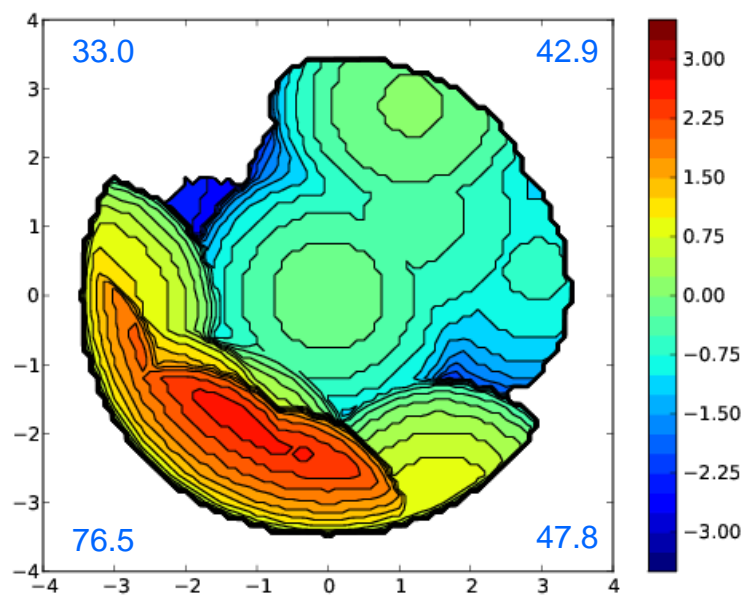

Figure S 38: Steric map of **4** (sphere radius is set to 3.5 Å). The blue numbers around the steric map indicate the %  $V_{\text{bur}}$  value of the corresponding quadrant

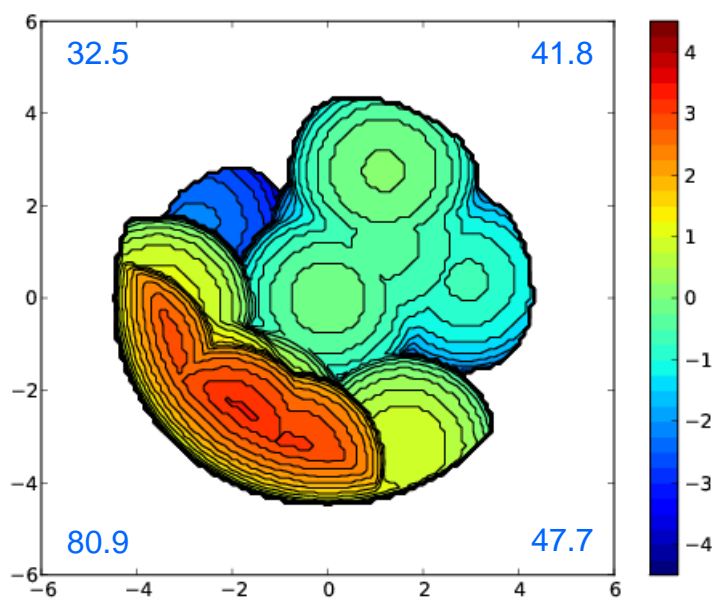

Figure S 39: Steric map of **4** (sphere radius is set to 4.5 Å). The blue numbers around the steric map indicate the %  $V_{\text{bur}}$  value of the corresponding quadrant.

## 2.2 Steric map of (ItBu)AuCl

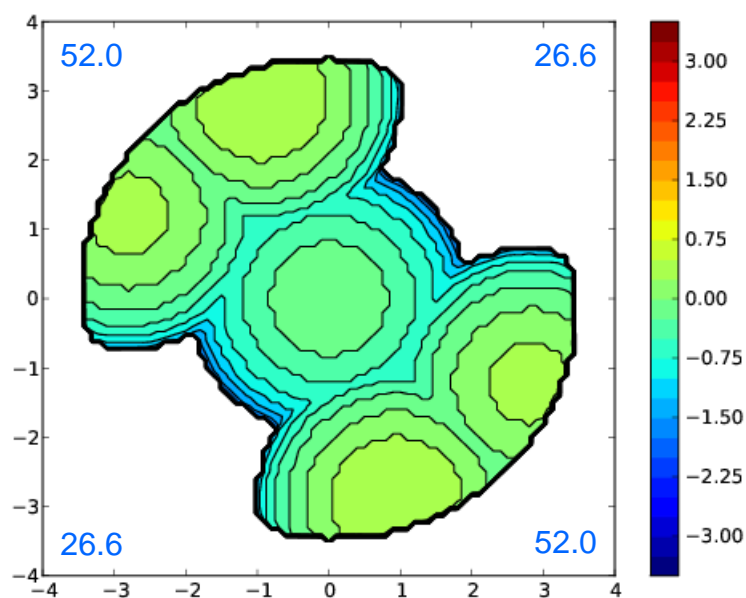

Figure S 40: Steric map of (ItBu)AuCl (sphere radius is set to 3.5 Å). The blue numbers around the steric map indicate the %  $V_{\text{bur}}$  value of the corresponding quadrant.

## 2.3 Steric map of (sIDipp)AuCl

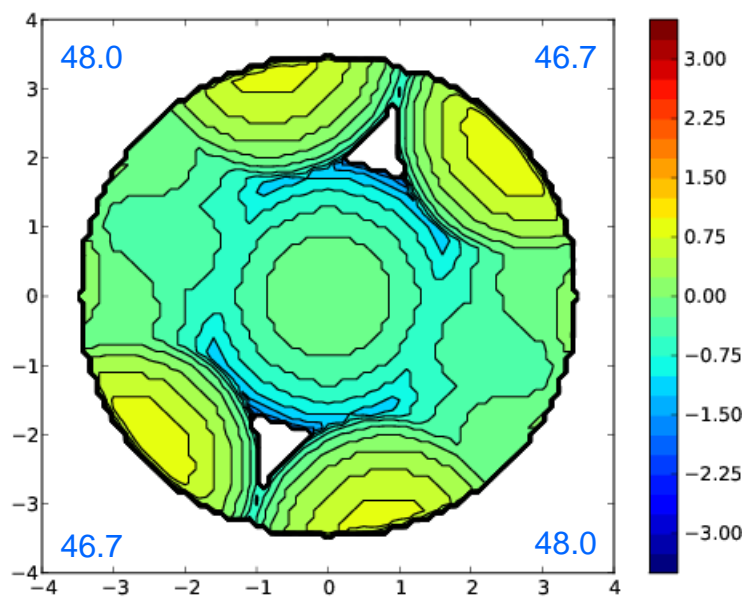

Figure S 41: Steric map of (sIDipp)AuCl (sphere radius is set to 3.5 Å). The blue numbers around the steric map indicate the %  $V_{\text{bur}}$  value of the corresponding quadrant.

### 3 X-ray Diffraction Studies

**General:** Single-crystal X-ray diffraction data of **1a**, **1b**, **3a**, **3b**, **4**, **6** and **7**: Crystals were selected under oil, mounted on glass capillaries, and then immediately placed in a cold stream of N<sub>2</sub> on a diffractometer. Data were collected on a Bruker AXS detector using Mo-K $\alpha$  radiation ( $\lambda = 0.71073 \text{ \AA}$ ). Using Olex2,<sup>8</sup> the structures were solved with the ShelXT<sup>9</sup> structure solution program using intrinsic phasing and refined with the ShelXL<sup>10</sup> refinement package using Least Squares minimization.

Crystallographic data have been deposited with the Cambridge Crystallographic Data Centre as supplementary publication no. 2190727 (**1a**), 2190728 (**1b**), 2190729 (**3a**), 2190730 (**3b**), 2190731 (**4**), 2190732 (**6**) and 2190733 (**7**). These data can be obtained free of charge via [www.ccdc.cam.ac.uk/data\\_request/cif](http://www.ccdc.cam.ac.uk/data_request/cif) (or from the CCDC, 12 Union Road, Cambridge CB2 1EZ, UK; fax: (+44) 1223-336-033; or [deposit@ccdc.cam.ac.uk](mailto:deposit@ccdc.cam.ac.uk)).



### 3.1 Crystal structure data of compound **1a**

|                        |                                                                   |
|------------------------|-------------------------------------------------------------------|
| CCDC deposition number | 2190727                                                           |
| Empirical formula      | C <sub>34</sub> H <sub>54</sub> ClF <sub>2</sub> N <sub>6</sub> P |
| Formula weight         | 651.25                                                            |
| Temperature/K          | 100.0                                                             |
| Crystal system         | monoclinic                                                        |
| Space group            | <i>P</i> 2 <sub>1</sub> / <i>c</i>                                |
| <i>a</i> /Å            | 26.3923(6)                                                        |
| <i>b</i> /Å            | 5.86980(10)                                                       |
| <i>c</i> /Å            | 26.0141(6)                                                        |
| $\alpha$ /°            | 90                                                                |
| $\beta$ /°             | 116.9270(10)                                                      |
| $\gamma$ /°            | 90                                                                |
| Volume/Å <sup>3</sup>  | 3593.12(13)                                                       |
| <i>Z</i>               | 4                                                                 |

|                                                              |                                                                               |
|--------------------------------------------------------------|-------------------------------------------------------------------------------|
| $\rho_{\text{calc}}/\text{cm}^3$                             | 1.204                                                                         |
| $\mu/\text{mm}^{-1}$                                         | 0.193                                                                         |
| <i>F</i> (000)                                               | 1400.0                                                                        |
| Crystal size/mm <sup>3</sup>                                 | 0.487 × 0.458 × 0.41                                                          |
| Radiation                                                    | MoK $\alpha$ ( $\lambda$ = 0.71073)                                           |
| 2 $\theta$ range for data collection/°                       | 4.774 to 59.21                                                                |
| Index ranges                                                 | -36 ≤ <i>h</i> ≤ 36, -8 ≤ <i>k</i> ≤ 8, -36 ≤ <i>l</i> ≤ 36                   |
| Reflections collected                                        | 54469                                                                         |
| Independent reflections                                      | 10031 [ <i>R</i> <sub>int</sub> = 0.0401, <i>R</i> <sub>sigma</sub> = 0.0264] |
| Data/restraints/parameters                                   | 10031/0/436                                                                   |
| Goodness-of-fit on <i>F</i> <sup>2</sup>                     | 1.194                                                                         |
| Final <i>R</i> indexes [ <i>I</i> ≥ 2 $\sigma$ ( <i>I</i> )] | <i>R</i> <sub>1</sub> = 0.0484, <i>wR</i> <sub>2</sub> = 0.1227               |
| Final <i>R</i> indexes [all data]                            | <i>R</i> <sub>1</sub> = 0.0497, <i>wR</i> <sub>2</sub> = 0.1238               |
| Largest diff. peak/hole / e Å <sup>-3</sup>                  | 0.54/-0.45                                                                    |

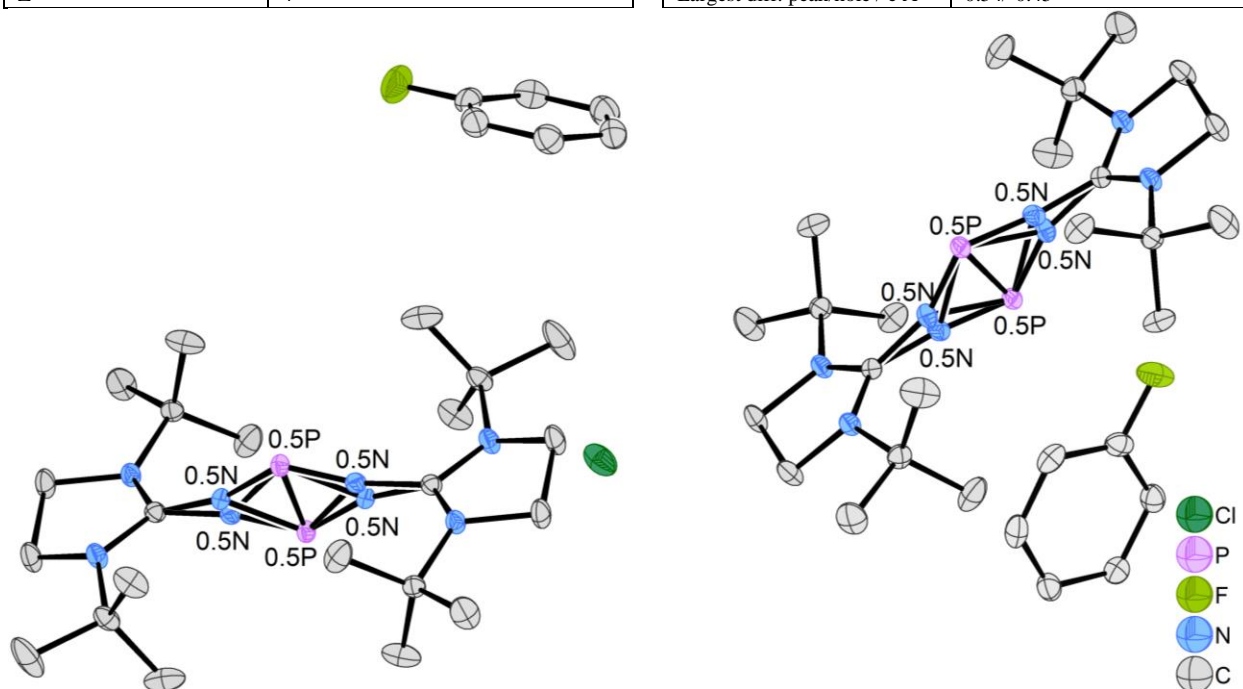

Figure S 42: Molecular view of **1a** in the solid state (ellipsoids at 50% probability). The hydrogen atoms are omitted. The asymmetric unit contains two half molecules of **1a** and two molecules of fluorobenzene. The PN<sub>2</sub> fragments are disordered over two positions in a ratio of 1:1.

### 3.2 Crystal structure data of compound **1b**

|                        |                                                  |                                               |                                                                    |
|------------------------|--------------------------------------------------|-----------------------------------------------|--------------------------------------------------------------------|
| CCDC deposition number | 2190728                                          | $\rho_{\text{calc}}/\text{mm}^3$              | 1.194                                                              |
| Empirical formula      | $\text{C}_{22}\text{H}_{40}\text{ClN}_6\text{P}$ | $\text{m}/\text{mm}^{-1}$                     | 0.234                                                              |
| Formula weight         | 455.02                                           | F(000)                                        | 492.0                                                              |
| Temperature/K          | 100                                              | Crystal size/ $\text{mm}^3$                   | $0.6 \times 0.576 \times 0.432$                                    |
| Crystal system         | triclinic                                        | Radiation                                     | $\text{MoK}\alpha$ ( $\lambda = 0.71073$ )                         |
| Space group            | $P\bar{1}$                                       | $2\theta$ range for data collection           | $3.582$ to $56.554^\circ$                                          |
| $a/\text{\AA}$         | $10.3440(2)$                                     | Index ranges                                  | $-13 \leq h \leq 13$ , $-14 \leq k \leq 14$ , $-16 \leq l \leq 16$ |
| $b/\text{\AA}$         | $10.8041(2)$                                     | Reflections collected                         | 19793                                                              |
| $c/\text{\AA}$         | $12.4387(2)$                                     | Independent reflections                       | 6269 [ $R_{\text{int}} = 0.0173$ , $R_{\text{sigma}} = 0.0177$ ]   |
| $\alpha/^\circ$        | $66.9530(10)$                                    | Data/restraints/parameters                    | 6269/0/283                                                         |
| $\beta/^\circ$         | $81.9680(10)$                                    | Goodness-of-fit on $F^2$                      | 1.029                                                              |
| $\gamma/^\circ$        | $84.7670(10)$                                    | Final R indexes [ $I \geq 2\sigma(I)$ ]       | $R_1 = 0.0288$ , $wR_2 = 0.0747$                                   |
| Volume/ $\text{\AA}^3$ | $1265.60(4)$                                     | Final R indexes [all data]                    | $R_1 = 0.0308$ , $wR_2 = 0.0762$                                   |
| Z                      | 2                                                | Largest diff. peak/hole / $\text{e \AA}^{-3}$ | 0.41/-0.24                                                         |

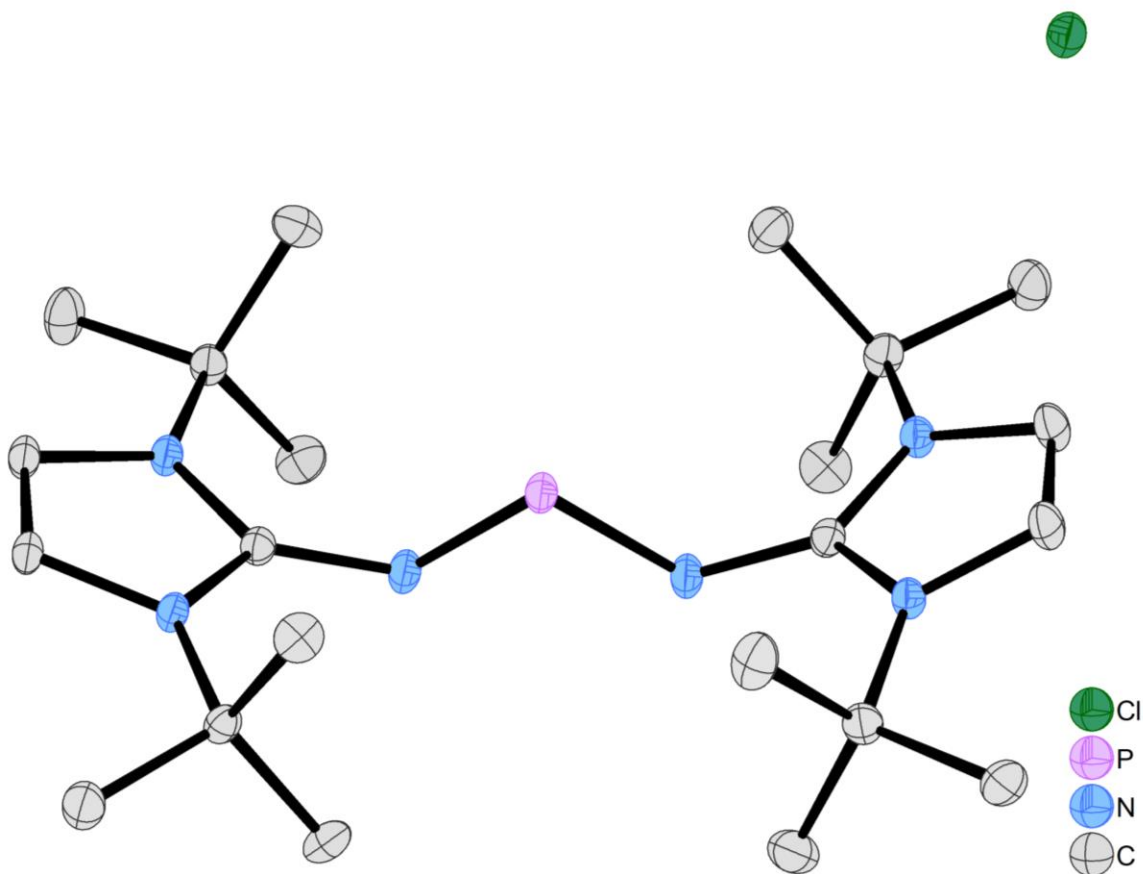

Figure S 43: Molecular view of **1b** in the solid state (ellipsoids at 50% probability). The hydrogen atoms are omitted. The asymmetric unit contains one molecule of **1b**.

### 3.3 Crystal structure data of compound **3a**

|                        |                                                  |                                               |                                                               |
|------------------------|--------------------------------------------------|-----------------------------------------------|---------------------------------------------------------------|
| CCDC deposition number | 2190729                                          | $\rho_{\text{calc}}/\text{cm}^3$              | 1.107                                                         |
| Empirical formula      | $\text{C}_{26}\text{H}_{53}\text{N}_6\text{PSi}$ | $\mu/\text{mm}^{-1}$                          | 0.153                                                         |
| Formula weight         | 508.80                                           | $F(000)$                                      | 560.0                                                         |
| Temperature/K          | 100                                              | Crystal size/ $\text{mm}^3$                   | $0.263 \times 0.19 \times 0.167$                              |
| Crystal system         | triclinic                                        | Radiation                                     | $\text{MoK}\alpha$ ( $\lambda = 0.71073$ )                    |
| Space group            | $P\bar{1}$                                       | $2\theta$ range for data collection/ $^\circ$ | 3.436 to 59.186                                               |
| $a/\text{\AA}$         | 11.0192(5)                                       | Index ranges                                  | $-15 \leq h \leq 15, -16 \leq k \leq 16, -17 \leq l \leq 17$  |
| $b/\text{\AA}$         | 11.9241(5)                                       | Reflections collected                         | 24627                                                         |
| $c/\text{\AA}$         | 12.4677(5)                                       | Independent reflections                       | 8484 [ $R_{\text{int}} = 0.0437, R_{\text{sigma}} = 0.0491$ ] |
| $\alpha/^\circ$        | 79.803(3)                                        | Data/restraints/parameters                    | 8484/0/322                                                    |
| $\beta/^\circ$         | 73.474(3)                                        | Goodness-of-fit on $F^2$                      | 1.082                                                         |
| $\gamma/^\circ$        | 78.577(3)                                        | Final R indexes [ $I \geq 2\sigma(I)$ ]       | $R_1 = 0.0559, wR_2 = 0.1559$                                 |
| Volume/ $\text{\AA}^3$ | 1526.65(12)                                      | Final R indexes [all data]                    | $R_1 = 0.0727, wR_2 = 0.1663$                                 |
| Z                      | 2                                                | Largest diff. peak/hole / $e \text{\AA}^{-3}$ | 0.65/-0.27                                                    |

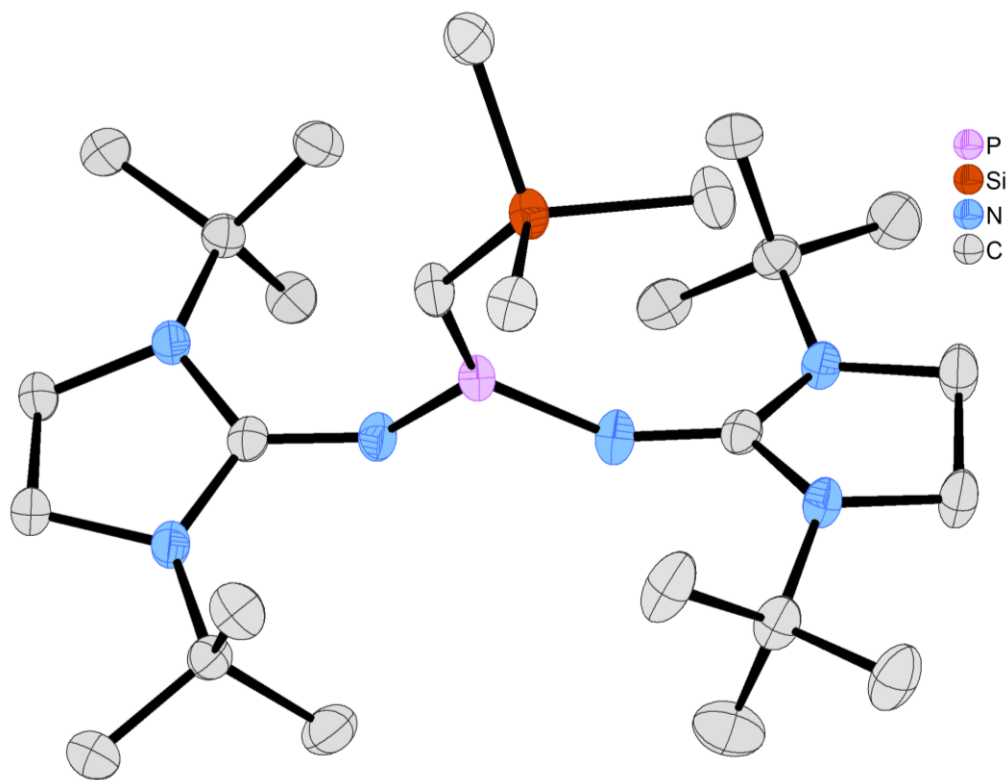

Figure S 44: Molecular view of **3a** in the solid state (ellipsoids at 50% probability). The hydrogen atoms are omitted. The asymmetric unit contains one molecule of **3a**.

### 3.4 Crystal structure data of compound **3b**

|                        |                                                  |                                               |                                                               |
|------------------------|--------------------------------------------------|-----------------------------------------------|---------------------------------------------------------------|
| CCDC deposition number | 2190730                                          | $\rho_{\text{calc}}/\text{cm}^3$              | 1.147                                                         |
| Empirical formula      | $\text{C}_{26}\text{H}_{49}\text{N}_6\text{PSi}$ | $\mu/\text{mm}^{-1}$                          | 0.160                                                         |
| Formula weight         | 504.77                                           | F(000)                                        | 552.0                                                         |
| Temperature/K          | 100.0                                            | Crystal size/ $\text{mm}^3$                   | $0.315 \times 0.162 \times 0.087$                             |
| Crystal system         | triclinic                                        | Radiation                                     | MoK $\alpha$ ( $\lambda = 0.71073$ )                          |
| Space group            | $P\bar{1}$                                       | $2\theta$ range for data collection/ $^\circ$ | 3.558 to 55.93                                                |
| a/ $\text{\AA}$        | 10.4710(2)                                       | Index ranges                                  | $-13 \leq h \leq 13, -15 \leq k \leq 15, -16 \leq l \leq 16$  |
| b/ $\text{\AA}$        | 11.9664(3)                                       | Reflections collected                         | 22524                                                         |
| c/ $\text{\AA}$        | 12.7029(3)                                       | Independent reflections                       | 7013 [ $R_{\text{int}} = 0.0515, R_{\text{sigma}} = 0.0522$ ] |
| $\alpha/^\circ$        | 79.3550(10)                                      | Data/restraints/parameters                    | 7013/0/382                                                    |
| $\beta/^\circ$         | 73.7850(10)                                      | Goodness-of-fit on $F^2$                      | 1.018                                                         |
| $\gamma/^\circ$        | 74.4050(10)                                      | Final R indexes [ $I > 2\sigma(I)$ ]          | $R_1 = 0.0463, wR_2 = 0.1129$                                 |
| Volume/ $\text{\AA}^3$ | 1461.71(6)                                       | Final R indexes [all data]                    | $R_1 = 0.0616, wR_2 = 0.1216$                                 |
| Z                      | 2                                                | Largest diff. peak/hole / $\text{e \AA}^{-3}$ | 0.37/-0.41                                                    |

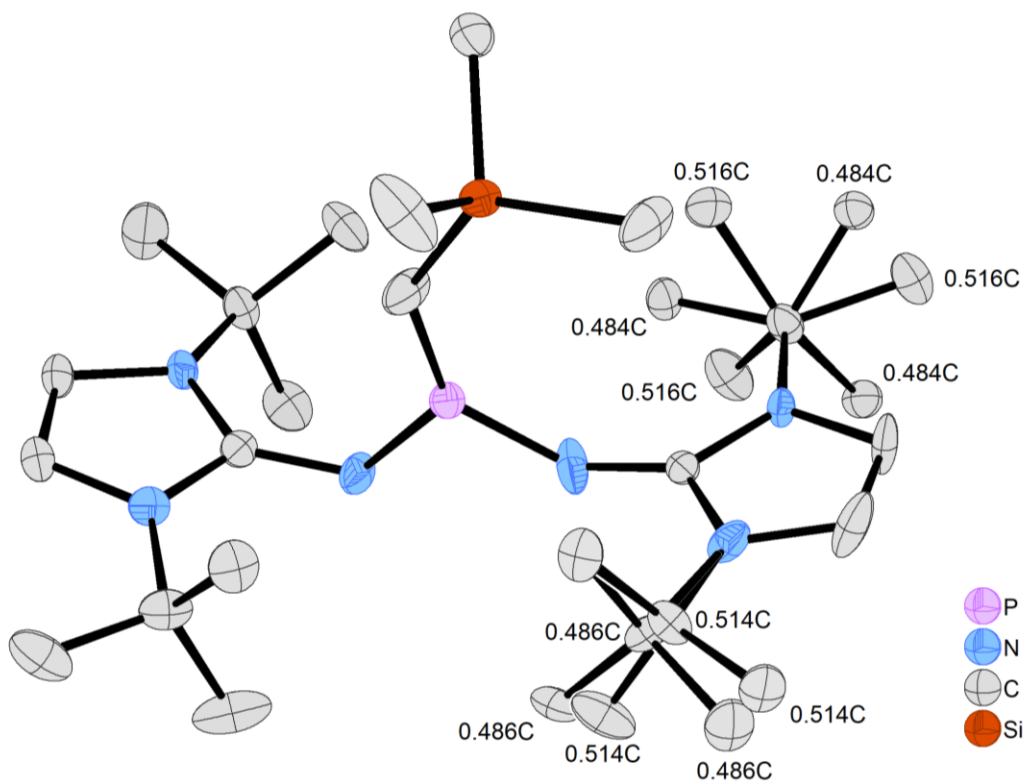

Figure S 45: Molecular view of **3b** in the solid state (ellipsoids at 50% probability). The hydrogen atoms are omitted. The asymmetric unit contains one molecule of **3b**. Two tert-butyl groups are disordered over two positions, respectively. The occupancies are shown next to the corresponding atoms.

### 3.5 Crystal structure data of compound **4**

|                        |                                                      |                                               |                                                               |
|------------------------|------------------------------------------------------|-----------------------------------------------|---------------------------------------------------------------|
| CCDC deposition number | 2190731                                              | $\rho_{\text{calc}}/\text{cm}^3$              | 1.522                                                         |
| Empirical formula      | $\text{C}_{26}\text{H}_{53}\text{AuClN}_6\text{PSi}$ | $\mu/\text{mm}^{-1}$                          | 4.742                                                         |
| Formula weight         | 741.22                                               | $F(000)$                                      | 1504.0                                                        |
| Temperature/K          | 100                                                  | Crystal size/ $\text{mm}^3$                   | $0.182 \times 0.165 \times 0.155$                             |
| Crystal system         | orthorhombic                                         | Radiation                                     | $\text{MoK}\alpha$ ( $\lambda = 0.71073$ )                    |
| Space group            | $P2_12_12_1$                                         | $2\theta$ range for data collection/ $^\circ$ | 3.648 to 58.05                                                |
| $a/\text{\AA}$         | 12.5776(4)                                           | Index ranges                                  | $-16 \leq h \leq 17, -19 \leq k \leq 19, -24 \leq l \leq 24$  |
| $b/\text{\AA}$         | 14.1333(4)                                           | Reflections collected                         | 48349                                                         |
| $c/\text{\AA}$         | 18.1953(6)                                           | Independent reflections                       | 8586 [ $R_{\text{int}} = 0.0555, R_{\text{sigma}} = 0.0398$ ] |
| $\alpha/^\circ$        | 90                                                   | Data/restraints/parameters                    | 8586/0/340                                                    |
| $\beta/^\circ$         | 90                                                   | Goodness-of-fit on $F^2$                      | 1.120                                                         |
| $\gamma/^\circ$        | 90                                                   | Final R indexes [ $I \geq 2\sigma(I)$ ]       | $R_1 = 0.0355, wR_2 = 0.0820$                                 |
| Volume/ $\text{\AA}^3$ | 3234.45(17)                                          | Final R indexes [all data]                    | $R_1 = 0.0413, wR_2 = 0.0845$                                 |
| Z                      | 4                                                    | Largest diff. peak/hole / $e \text{\AA}^{-3}$ | 2.03/-0.45                                                    |

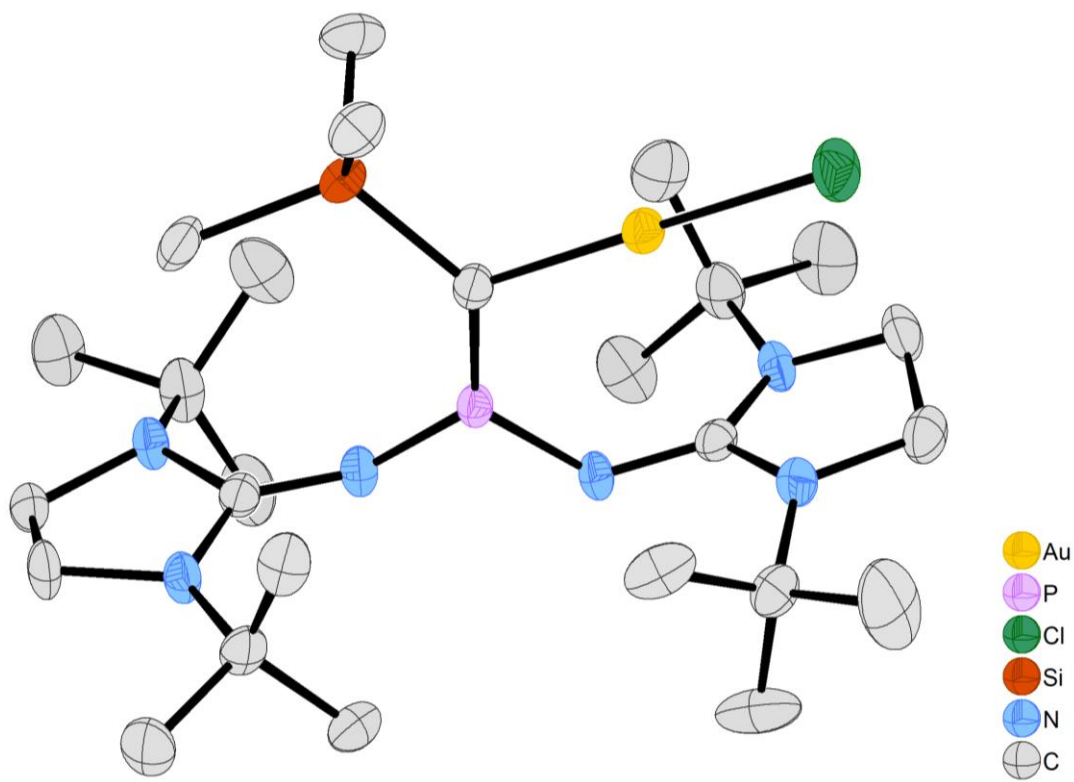

Figure S 46: Molecular view of **4** in the solid state (ellipsoids at 50% probability). The hydrogen atoms are omitted. The asymmetric unit contains one molecule of **4**.

### 3.6 Crystal structure data of compound **6**

|                        |                                                                       |                                               |                                                                |
|------------------------|-----------------------------------------------------------------------|-----------------------------------------------|----------------------------------------------------------------|
| CCDC deposition number | 2190732                                                               | $\rho_{\text{calc}}/\text{cm}^3$              | 1.246                                                          |
| Empirical formula      | $\text{C}_{40}\text{H}_{73}\text{Cu}_2\text{N}_6\text{O}_2\text{PSi}$ | $\mu/\text{mm}^{-1}$                          | 1.032                                                          |
| Formula weight         | 856.18                                                                | $F(000)$                                      | 3664.0                                                         |
| Temperature/K          | 100.0                                                                 | Crystal size/ $\text{mm}^3$                   | $0.528 \times 0.524 \times 0.165$                              |
| Crystal system         | orthorhombic                                                          | Radiation                                     | $\text{MoK}\alpha$ ( $\lambda = 0.71073$ )                     |
| Space group            | $Pbca$                                                                | $2\theta$ range for data collection/ $^\circ$ | 3.398 to 56.624                                                |
| $a/\text{\AA}$         | 21.6481(9)                                                            | Index ranges                                  | $-28 \leq h \leq 28, -24 \leq k \leq 24, -29 \leq l \leq 29$   |
| $b/\text{\AA}$         | 18.7415(8)                                                            | Reflections collected                         | 131767                                                         |
| $c/\text{\AA}$         | 22.4951(9)                                                            | Independent reflections                       | 11234 [ $R_{\text{int}} = 0.0626, R_{\text{sigma}} = 0.0294$ ] |
| $\alpha/^\circ$        | 90                                                                    | Data/restraints/parameters                    | 11234/0/490                                                    |
| $\beta/^\circ$         | 90                                                                    | Goodness-of-fit on $F^2$                      | 1.121                                                          |
| $\gamma/^\circ$        | 90                                                                    | Final R indexes [ $I \geq 2\sigma(I)$ ]       | $R_1 = 0.0527, wR_2 = 0.1432$                                  |
| Volume/ $\text{\AA}^3$ | 9126.7(7)                                                             | Final R indexes [all data]                    | $R_1 = 0.0672, wR_2 = 0.1538$                                  |
| Z                      | 8                                                                     | Largest diff. peak/hole / $e \text{\AA}^{-3}$ | 2.24/-0.53                                                     |

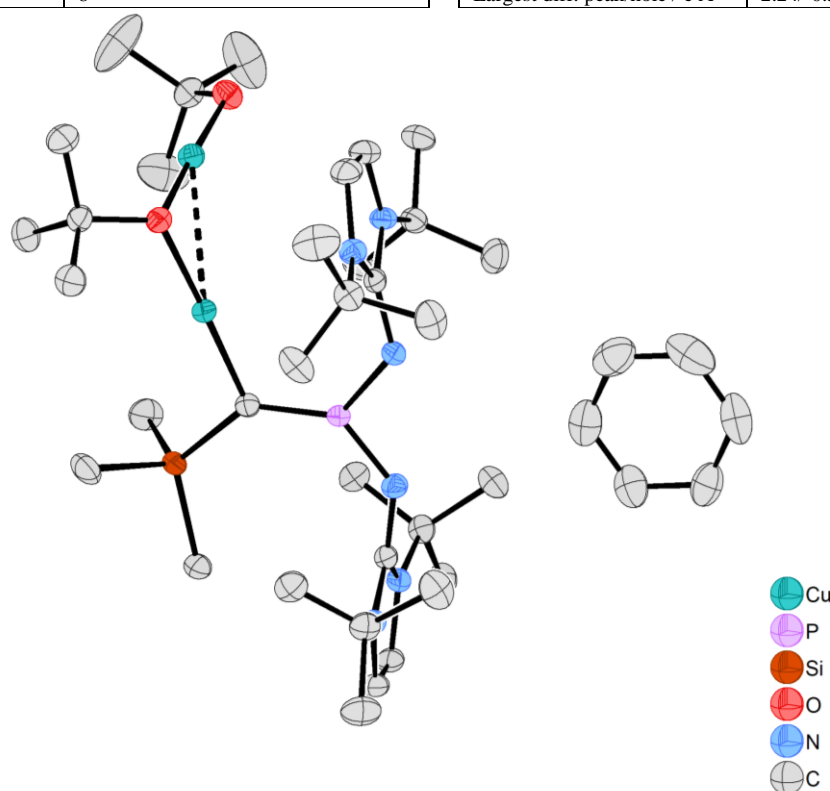

Figure S 47: Molecular view of **6** in the solid state (ellipsoids at 50% probability). The hydrogen atoms are omitted. The asymmetric unit contains one molecule of **6** and one molecule of benzene.

Note: The highest residual electron density (Q1) is located about 1.8  $\text{\AA}$  adjacent to an imidazoline C atom, suggesting that it corresponds to a copper atom with an occupancy of 3%. One explanation would be that, similar to the formation of **7**, CH activation has occurred and that the metallated species is present at about 3% in the crystal lattice. Because of the low occupancy, the lighter atoms cannot be located on the residual electron density map.

### 3.7 Crystal structure data of compound **7**

|                                       |                                                              |                                                |                                                                    |
|---------------------------------------|--------------------------------------------------------------|------------------------------------------------|--------------------------------------------------------------------|
| CCDC deposition number                | 2190732                                                      | $\mu/\text{mm}^{-1}$                           | 0.746                                                              |
| Empirical formula                     | $\text{C}_{32}\text{H}_{52}\text{CuF}_2\text{N}_6\text{PSi}$ | F(000)                                         | 1448.0                                                             |
| Formula weight                        | 681.39                                                       | Crystal size/ $\text{mm}^3$                    | $0.78 \times 0.2 \times 0.116$                                     |
| Temperature/K                         | 100                                                          | Radiation                                      | MoK $\alpha$ ( $\lambda = 0.71073$ )                               |
| Crystal system                        | orthorhombic                                                 | 2 $\theta$ range for data collection/ $^\circ$ | 4.054 to 58.23                                                     |
| Space group                           | $Pna2_1$                                                     | Index ranges                                   | $-27 \leq h \leq 26$ , $-13 \leq k \leq 13$ , $-23 \leq l \leq 23$ |
| a/ $\text{\AA}$                       | 20.0953(8)                                                   | Reflections collected                          | 45781                                                              |
| b/ $\text{\AA}$                       | 10.1679(4)                                                   | Independent reflections                        | 9272 [ $R_{\text{int}} = 0.0591$ , $R_{\text{sigma}} = 0.0510$ ]   |
| c/ $\text{\AA}$                       | 17.1211(7)                                                   | Data/restraints/parameters                     | 9272/1/403                                                         |
| $\alpha/^\circ$                       | 90                                                           | Goodness-of-fit on $F^2$                       | 1.080                                                              |
| $\beta/^\circ$                        | 90                                                           | Final R indexes [ $I \geq 2\sigma(I)$ ]        | $R_1 = 0.0506$ , $wR_2 = 0.1236$                                   |
| $\gamma/^\circ$                       | 90                                                           | Final R indexes [all data]                     | $R_1 = 0.0579$ , $wR_2 = 0.1285$                                   |
| Volume/ $\text{\AA}^3$                | 3498.3(2)                                                    | Largest diff. peak/hole / $\text{e \AA}^{-3}$  | 1.56/-0.32                                                         |
| Z                                     | 4                                                            | Flack parameter                                | 0.012(5)                                                           |
| $\rho_{\text{calc}}/\text{g cm}^{-3}$ | 1.294                                                        |                                                |                                                                    |

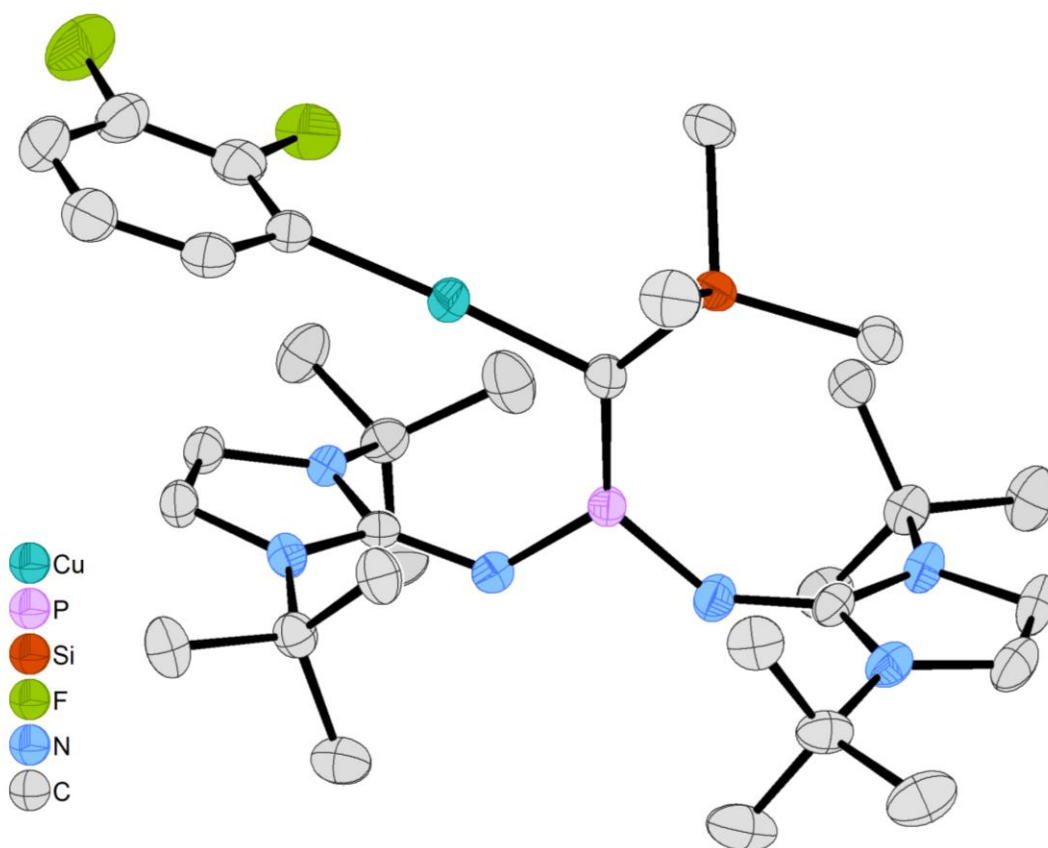

Figure S 48: Molecular view of **7** in the solid state (ellipsoids at 50% probability). The hydrogen atoms are omitted. The asymmetric unit contains one molecule of **7**.

## 4 Computational studies

### 4.1 General

The geometry optimizations and frequency calculations were performed with ORCA 5.0,<sup>11</sup> using the B3LYP<sup>12</sup> functional with a dispersion correction (D4)<sup>13</sup>. A triple zeta basis set (def2-TZVP)<sup>14</sup> with an RIJCOSX<sup>15</sup> approximation was used in all calculations. The absence of any imaginary frequencies confirmed that each optimized structure is at a local minimum.

### 4.2 Optimized structures

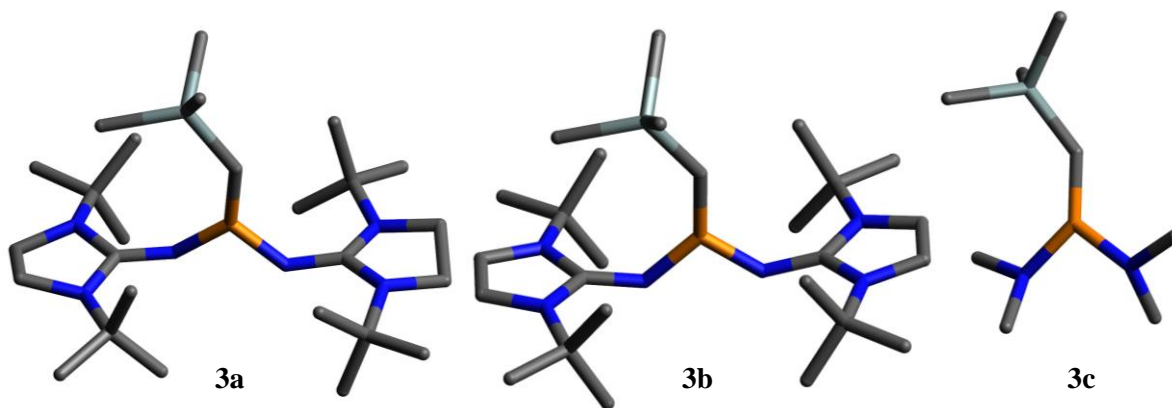

Figure S 49: Optimized structures of **3a** (left), **3b** (middle), and (Me<sub>2</sub>N)<sub>2</sub>PCSiMe<sub>3</sub> (**3c**, right). The hydrogen atoms are omitted for clarity.



### 4.3 Selected molecular orbitals

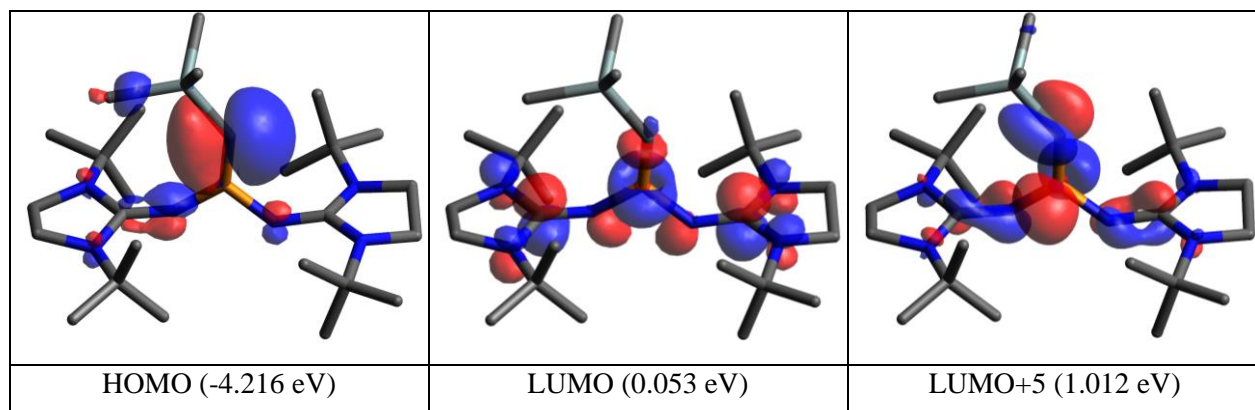

Figure S 50: Selected orbitals of **3a**.

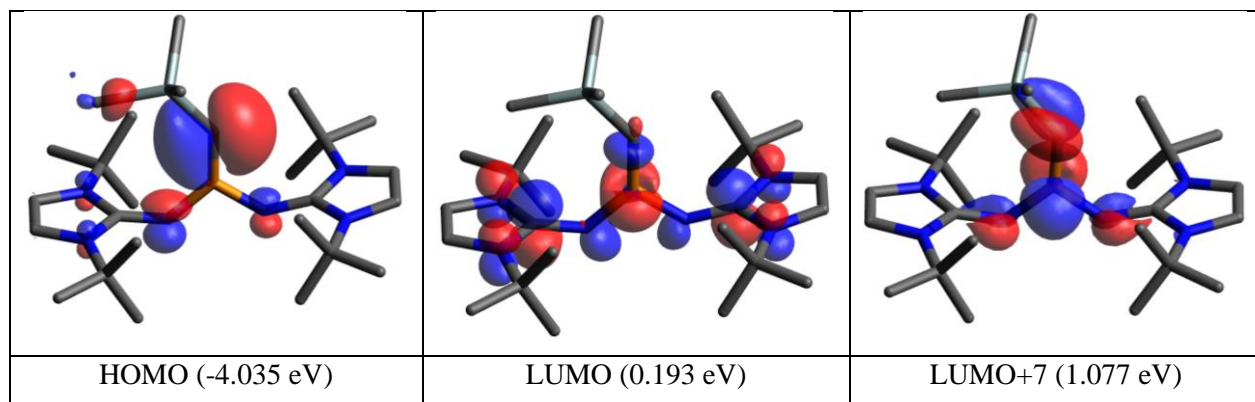

Figure S 51: Selected orbitals of **3b**.

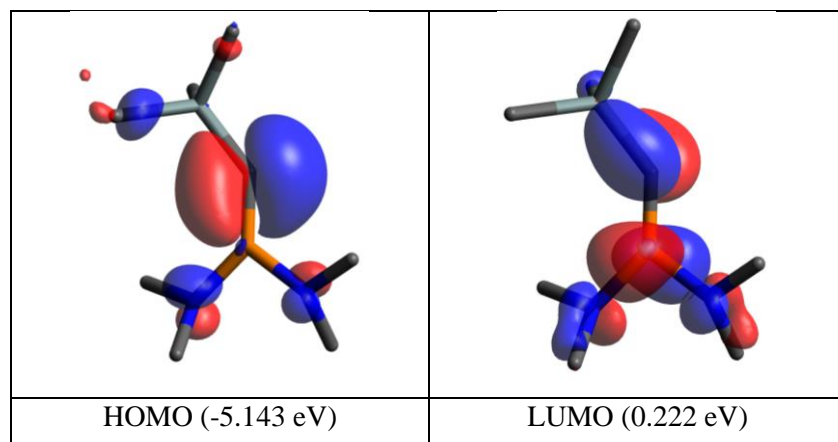

Figure S 52: Frontier orbitals of **3c**.

#### 4.4 XYZ data of the optimized structures

##### 3a

Number of atoms: 87

Charge = 0, multiplicity = 1

|    |          |          |          |
|----|----------|----------|----------|
| P  | -0.07217 | 0.09037  | -0.06233 |
| Si | 2.86093  | -0.19903 | 0.96644  |
| N  | -2.97897 | -0.02390 | 2.18365  |
| N  | 0.89021  | 2.45781  | -2.58493 |
| N  | -1.64513 | -0.03817 | 0.24494  |
| N  | -2.66395 | -1.99148 | 1.16777  |
| N  | 1.43963  | 0.46344  | -3.44528 |
| N  | -0.05649 | 0.49122  | -1.62651 |
| C  | -2.33965 | -0.65449 | 1.14414  |
| C  | 0.71420  | 1.09830  | -2.45824 |
| C  | 0.39083  | 3.49822  | -1.64959 |
| C  | -3.35404 | -2.29073 | 2.41703  |
| H  | -2.64932 | -2.64051 | 3.18193  |
| H  | -4.12818 | -3.04179 | 2.28792  |
| C  | -3.14026 | 1.45106  | 2.29543  |
| C  | -2.01228 | -3.07452 | 0.38246  |
| C  | -3.93606 | -0.93873 | 2.78966  |
| H  | -4.93804 | -0.81002 | 2.35780  |
| H  | -4.00412 | -0.80720 | 3.86624  |
| C  | -3.95438 | 1.97565  | 1.10428  |
| H  | -3.45139 | 1.74860  | 0.16682  |
| H  | -4.07916 | 3.05758  | 1.18030  |
| H  | -4.94955 | 1.52455  | 1.08595  |
| C  | 1.94483  | 1.45708  | -4.38244 |
| H  | 1.26467  | 1.58447  | -5.23585 |
| H  | 2.93071  | 1.19867  | -4.76019 |
| C  | 3.44074  | -2.00004 | 1.00274  |
| H  | 3.03143  | -2.51533 | 1.87501  |
| H  | 4.53142  | -2.07490 | 1.04524  |
| H  | 3.10038  | -2.53752 | 0.11409  |
| C  | 1.97403  | 2.71248  | -3.52596 |
| H  | 2.93481  | 2.81241  | -3.00646 |
| H  | 1.80183  | 3.60683  | -4.11783 |
| C  | -1.77113 | 2.13691  | 2.37886  |
| H  | -1.14731 | 1.65818  | 3.13343  |
| H  | -1.91234 | 3.18487  | 2.65157  |
| H  | -1.23545 | 2.09772  | 1.43929  |
| C  | 1.20422  | -0.94618 | -3.86102 |
| C  | 1.15711  | 3.45997  | -0.32142 |
| H  | 1.05276  | 2.50350  | 0.18831  |

|   |          |          |          |
|---|----------|----------|----------|
| H | 0.78820  | 4.24342  | 0.34393  |
| H | 2.22130  | 3.63837  | -0.48756 |
| C | 1.06598  | -0.14225 | 0.99961  |
| C | -1.12012 | 3.33233  | -1.43444 |
| H | -1.64203 | 3.38945  | -2.39164 |
| H | -1.47994 | 4.14304  | -0.79866 |
| H | -1.38131 | 2.38891  | -0.97002 |
| C | 3.56468  | 0.66193  | 2.49505  |
| H | 3.28092  | 1.71779  | 2.50968  |
| H | 4.65694  | 0.60696  | 2.52716  |
| H | 3.17277  | 0.20500  | 3.40682  |
| C | -3.89092 | 1.75731  | 3.59765  |
| H | -4.89958 | 1.34285  | 3.60702  |
| H | -3.98030 | 2.83847  | 3.70148  |
| H | -3.34723 | 1.38188  | 4.46655  |
| C | -0.60205 | -3.35343 | 0.91913  |
| H | -0.64716 | -3.69357 | 1.95653  |
| H | 0.03000  | -2.46641 | 0.88683  |
| H | -0.12885 | -4.14364 | 0.33220  |
| C | 3.72659  | 0.61334  | -0.51897 |
| H | 3.38536  | 0.19532  | -1.46713 |
| H | 4.81048  | 0.47278  | -0.45845 |
| H | 3.53620  | 1.68858  | -0.54169 |
| C | 2.12389  | -1.26759 | -5.04545 |
| H | 3.17414  | -1.13076 | -4.78263 |
| H | 1.89915  | -0.66444 | -5.92587 |
| H | 1.98353  | -2.31320 | -5.31982 |
| C | 1.57364  | -1.90450 | -2.72237 |
| H | 1.41121  | -2.93336 | -3.04980 |
| H | 0.98665  | -1.73205 | -1.82810 |
| H | 2.62595  | -1.79243 | -2.46022 |
| C | -2.86304 | -4.34515 | 0.52759  |
| H | -2.43765 | -5.12220 | -0.10728 |
| H | -3.89308 | -4.17499 | 0.20702  |
| H | -2.87003 | -4.72819 | 1.54833  |
| C | -1.99181 | -2.72172 | -1.11053 |
| H | -1.35647 | -1.87697 | -1.34139 |
| H | -2.99926 | -2.48658 | -1.45892 |
| H | -1.62810 | -3.58615 | -1.66861 |
| C | 0.60584  | 4.87264  | -2.29873 |
| H | 1.66220  | 5.11004  | -2.42900 |
| H | 0.17750  | 5.63454  | -1.64758 |
| H | 0.10648  | 4.93990  | -3.26718 |
| C | -0.25702 | -1.12758 | -4.29791 |
| H | -0.49178 | -0.46795 | -5.13698 |
| H | -0.93742 | -0.90232 | -3.48040 |
| H | -0.42790 | -2.15576 | -4.62252 |

**3b**

Number of atoms: 83

Charge = 0, multiplicity = 1

|    |          |          |          |   |          |          |          |
|----|----------|----------|----------|---|----------|----------|----------|
| P  | 0.00213  | -0.00757 | 0.11153  | H | 3.05076  | 1.73856  | -2.87507 |
| N  | 1.63189  | -3.14847 | 0.88895  | C | 3.90395  | -0.24805 | 0.47875  |
| N  | -2.72629 | 2.32796  | -0.17106 | H | 3.66060  | -0.23939 | 1.54261  |
| N  | -2.67630 | 1.13401  | -2.01726 | H | 4.97957  | -0.06719 | 0.38475  |
| N  | -1.57650 | 0.22218  | -0.09325 | H | 3.70660  | -1.25565 | 0.10848  |
| C  | 1.00015  | -2.07003 | 1.47186  | C | 3.47072  | 2.73030  | 0.22311  |
| C  | -3.42471 | 2.27139  | -2.26464 | H | 2.99419  | 3.55174  | -0.31704 |
| H  | -3.88240 | 2.47539  | -3.21144 | H | 4.55502  | 2.85931  | 0.15425  |
| C  | 1.29166  | -3.72760 | -0.44415 | H | 3.18864  | 2.82234  | 1.27569  |
| C  | -2.22687 | 1.16544  | -0.71581 | C | 1.37814  | 0.43482  | 3.38185  |
| C  | -3.45427 | 3.00170  | -1.13603 | H | 2.45580  | 0.58483  | 3.30969  |
| H  | -3.94159 | 3.93771  | -0.95189 | N | 0.01697  | -1.38000 | 0.97173  |
| C  | -2.36207 | 0.07399  | -3.02030 | N | 1.53744  | -1.95344 | 2.73695  |
| C  | -1.01269 | 3.29528  | 1.30697  | C | 2.54615  | -3.67313 | 1.78611  |
| H  | -0.84639 | 4.14240  | 0.63882  | H | 3.18058  | -4.50450 | 1.55388  |
| H  | -0.30776 | 2.51668  | 1.01963  | C | 2.48883  | -2.94370 | 2.91392  |
| H  | -0.79521 | 3.61696  | 2.32759  | H | 3.06616  | -3.04556 | 3.81049  |
| C  | -2.72243 | -1.30296 | -2.44945 | C | 2.10145  | -5.00953 | -0.65408 |
| H  | -2.16356 | -1.52304 | -1.54582 | H | 1.87949  | -5.76298 | 0.10322  |
| H  | -2.50585 | -2.06563 | -3.19916 | H | 3.17543  | -4.81772 | -0.66316 |
| H  | -3.78727 | -1.34941 | -2.21179 | H | 1.83351  | -5.42522 | -1.62510 |
| C  | -0.88007 | 0.16825  | -3.39702 | C | -0.20117 | -4.08006 | -0.46839 |
| H  | -0.67096 | 1.13138  | -3.86606 | H | -0.81706 | -3.20245 | -0.29371 |
| H  | -0.63180 | -0.62161 | -4.10891 | H | -0.42772 | -4.82058 | 0.30163  |
| H  | -0.22449 | 0.08609  | -2.53270 | H | -0.45618 | -4.50723 | -1.43951 |
| C  | -2.46862 | 2.82746  | 1.21273  | C | 1.65450  | -2.73542 | -1.55263 |
| C  | -3.20872 | 0.30797  | -4.27504 | H | 1.36860  | -3.15342 | -2.51953 |
| H  | -4.27763 | 0.29178  | -4.05489 | H | 2.72922  | -2.55122 | -1.56517 |
| H  | -3.00039 | -0.49610 | -4.98045 | H | 1.15854  | -1.77700 | -1.42905 |
| H  | -2.96029 | 1.24761  | -4.77010 | H | 0.98822  | 1.11784  | 4.13870  |
| C  | -3.39475 | 4.01475  | 1.49454  | H | 0.94548  | 0.70044  | 2.42155  |
| H  | -4.44718 | 3.74445  | 1.39074  | C | 1.79451  | -1.31171 | 5.10010  |
| H  | -3.18012 | 4.86762  | 0.84964  | H | 2.87129  | -1.16039 | 5.01088  |
| H  | -3.23159 | 4.33619  | 2.52291  | H | 1.60372  | -2.32808 | 5.44789  |
| C  | -2.78366 | 1.72602  | 2.23249  | H | 1.42857  | -0.62491 | 5.86299  |
| H  | -2.62933 | 2.12080  | 3.23786  | C | -0.44079 | -1.21839 | 4.00728  |
| H  | -2.15480 | 0.85416  | 2.09234  | H | -0.79579 | -0.52946 | 4.77521  |
| H  | -3.82544 | 1.41069  | 2.14485  | H | -0.63389 | -2.23810 | 4.34708  |
| Si | 2.91457  | 1.06324  | -0.47825 | H | -1.00123 | -1.04850 | 3.09227  |
| C  | 1.12864  | 0.94605  | -0.43654 | C | 1.06300  | -1.00720 | 3.79031  |
| C  | 3.52047  | 0.96082  | -2.26819 |   |          |          |          |
| H  | 3.25871  | -0.00378 | -2.71130 |   |          |          |          |
| H  | 4.60563  | 1.08071  | -2.34024 |   |          |          |          |

**(Me<sub>2</sub>N)<sub>2</sub>PCSiMe<sub>3</sub> (3c)**

Number of atoms: 33

Charge = 0, multiplicity = 1

|    |          |          |          |
|----|----------|----------|----------|
| P  | 0.16563  | -0.29049 | -0.44265 |
| Si | 2.94634  | 1.21341  | -0.76994 |
| C  | 1.19288  | 0.78284  | -0.92260 |
| C  | 3.48386  | 2.25582  | -2.24337 |
| H  | 3.35630  | 1.70368  | -3.17795 |
| H  | 4.53482  | 2.54885  | -2.16706 |
| H  | 2.88080  | 3.16406  | -2.31255 |
| C  | 4.07105  | -0.30375 | -0.70695 |
| H  | 3.87446  | -0.90273 | 0.18545  |
| H  | 5.12807  | -0.02239 | -0.69632 |
| H  | 3.90414  | -0.94204 | -1.57826 |
| C  | 3.21648  | 2.22896  | 0.79740  |
| H  | 2.56657  | 3.10674  | 0.80797  |
| H  | 4.25164  | 2.57543  | 0.86475  |
| H  | 3.00195  | 1.64573  | 1.69616  |
| N  | -1.36614 | -0.46465 | -1.07536 |
| N  | 0.18833  | -1.47625 | 0.74065  |
| C  | -0.29153 | -2.83362 | 0.51291  |
| H  | 0.54333  | -3.51527 | 0.31056  |
| H  | -0.82283 | -3.20016 | 1.39666  |
| H  | -0.96976 | -2.85765 | -0.33581 |
| C  | 1.17895  | -1.36082 | 1.79997  |
| H  | 0.75212  | -1.72412 | 2.73933  |
| H  | 2.07972  | -1.94595 | 1.58214  |
| H  | 1.46949  | -0.32018 | 1.92561  |
| C  | -1.61916 | 0.14077  | -2.37787 |
| H  | -2.41187 | -0.41893 | -2.88178 |
| H  | -1.93063 | 1.18717  | -2.28483 |
| H  | -0.71542 | 0.11401  | -2.98087 |
| C  | -2.54404 | -0.52556 | -0.21692 |
| H  | -3.30284 | -1.16772 | -0.67228 |
| H  | -2.28593 | -0.93053 | 0.75801  |
| H  | -2.97961 | 0.47116  | -0.07347 |

## 5 References

- 1 R. Uson, A. Laguna, M. Laguna, D. A. Briggs, H. H. Murray and J. P. Fackler, in *Inorganic Syntheses*, John Wiley & Sons, Inc, 2007, pp. 85–91.
- 2 T. Tsuda, T. Hashimoto and T. Saegusa, *J. Am. Chem. Soc.*, 1972, **94**, 658–659.
- 3 M. Tamm, S. Randoll, T. Bannenberg and E. Herdtweck, *Chem. Commun.*, 2004, 876–877.
- 4 M. D. Böhme, T. Eder, M. B. Röthel, P. D. Dutschke, L. F. B. Wilm, F. E. Hahn and F. Dielmann, *Angew. Chem. Int. Ed.*, 2022, e202202190.
- 5 L. Falivene, Z. Cao, A. Petta, L. Serra, A. Poater, R. Oliva, V. Scarano and L. Cavallo, *Nat. Chem.*, 2019, **11**, 872–879.
- 6 M. V. Baker, P. J. Barnard, S. K. Brayshaw, J. L. Hickey, B. W. Skelton and A. H. White, *Dalton Trans.*, 2005, 37–43.
- 7 P. de Frémont, N. M. Scott, E. D. Stevens and S. P. Nolan, *Organometallics*, 2005, **24**, 2411–2418.
- 8 O. V. Dolomanov, L. J. Bourhis, R. J. Gildea, J. A. K. Howard and H. Puschmann, *J. Appl. Crystallogr.*, 2009, **42**, 339–341.
- 9 G. M. Sheldrick, *Acta Crystallogr. A*, 2015, **71**, 3–8.
- 10 G. M. Sheldrick, *Acta Crystallogr. C*, 2015, **71**, 3–8.
- 11 a) F. Neese, *Wiley Interdiscip. Rev. Comput. Mol. Sci.*, 2012, **2**, 73–78; b) F. Neese, *Wiley Interdiscip. Rev. Comput. Mol. Sci.*, 2022, **12**, DOI: 10.1002/wcms.1606;
- 12 P. J. Stephens, F. J. Devlin, C. F. Chabalowski and M. J. Frisch, *J. Phys. Chem.*, 1994, **98**, 11623–11627.
- 13 a) E. Caldeweyher, S. Ehlert, A. Hansen, H. Neugebauer, S. Spicher, C. Bannwarth and S. Grimme, *J. Chem. Phys.*, 2019, **150**, 154122; b) E. Caldeweyher, C. Bannwarth and S. Grimme, *J. Chem. Phys.*, 2017, **147**, 34112;
- 14 a) F. Weigend, *Phys. Chem. Chem. Phys.*, 2006, **8**, 1057–1065; b) F. Weigend and R. Ahlrichs, *Phys. Chem. Chem. Phys.*, 2005, **7**, 3297–3305;
- 15 B. Helmich-Paris, B. de Souza, F. Neese and R. Izsák, *J. Chem. Phys.*, 2021, **155**, 104109.
